# Supplementary material for: Radiogenomics of breast cancer using dynamic contrast enhanced MRI and gene expression profiling
Source: Cancer Imaging. 2019 Jul 15;19:48. doi: 10.1186/s40644-019-0233-5 (PMC6628478; doi:10.1186/s40644-019-0233-5)
Supplement: Supplementary file 1 — Table S1. Gene Set Enrichment Analysis and Significant Pathways. The first tab includes all statistically significant associations between radiomic features and genetic pathways included in the Kyoto Encyclopedia of Genes and Genomes (KEGG) database. All these associations are identified through Gene Set Enrichment Analysis (GSEA). In the second tab, pathways are grouped by major categories and listed with the total number of radiomic associations. (XLS 129 kb) [file 40644_2019_233_MOESM1_ESM.xls]

## Sheet: GSEA Data
ImageFeature	GeneticFeature	Direction	AdjustedPValue
Size/Lesion volume (S1)	N_GLYCAN_BIOSYNTHESIS	-	0.040005
Size/Lesion volume (S1)	OTHER_GLYCAN_DEGRADATION	-	0.00041548
Size/Lesion volume (S1)	GLYCOSAMINOGLYCAN_DEGRADATION	-	0.0040678
Size/Lesion volume (S1)	GLYCOSPHINGOLIPID_BIOSYNTHESIS_GANGLIO_SERIES	-	0.03734
Size/Lesion volume (S1)	DNA_REPLICATION	+	0.0041488
Size/Lesion volume (S1)	SPLICEOSOME	+	0.02045
Size/Lesion volume (S1)	BASE_EXCISION_REPAIR	+	0.037881
Size/Lesion volume (S1)	MISMATCH_REPAIR	+	0.029682
Size/Lesion volume (S1)	HOMOLOGOUS_RECOMBINATION	+	0
Size/Lesion volume (S1)	NON_HOMOLOGOUS_END_JOINING	+	0.008442
Size/Lesion volume (S1)	CYTOKINE_CYTOKINE_RECEPTOR_INTERACTION	-	0
Size/Lesion volume (S1)	CHEMOKINE_SIGNALING_PATHWAY	-	0.0036723
Size/Lesion volume (S1)	NEUROACTIVE_LIGAND_RECEPTOR_INTERACTION	-	0.0019719
Size/Lesion volume (S1)	CELL_CYCLE	+	0
Size/Lesion volume (S1)	OOCYTE_MEIOSIS	+	0.016319
Size/Lesion volume (S1)	LYSOSOME	-	0.00028058
Size/Lesion volume (S1)	PEROXISOME	-	0.0076303
Size/Lesion volume (S1)	APOPTOSIS	-	0.0031507
Size/Lesion volume (S1)	CELL_ADHESION_MOLECULES_CAMS	-	0.00034294
Size/Lesion volume (S1)	COMPLEMENT_AND_COAGULATION_CASCADES	-	0
Size/Lesion volume (S1)	ANTIGEN_PROCESSING_AND_PRESENTATION	-	0.006938
Size/Lesion volume (S1)	TOLL_LIKE_RECEPTOR_SIGNALING_PATHWAY	-	0.014687
Size/Lesion volume (S1)	JAK_STAT_SIGNALING_PATHWAY	-	0.0036992
Size/Lesion volume (S1)	HEMATOPOIETIC_CELL_LINEAGE	-	0
Size/Lesion volume (S1)	NATURAL_KILLER_CELL_MEDIATED_CYTOTOXICITY	-	0.0075407
Size/Lesion volume (S1)	B_CELL_RECEPTOR_SIGNALING_PATHWAY	-	0.012262
Size/Lesion volume (S1)	INTESTINAL_IMMUNE_NETWORK_FOR_IGA_PRODUCTION	-	3.215e-05
Size/Lesion volume (S1)	TASTE_TRANSDUCTION	+	0.00048103
Size/Lesion volume (S1)	TYPE_I_DIABETES_MELLITUS	-	0.00056952
Size/Lesion volume (S1)	LEISHMANIA_INFECTION	-	1.6075e-05
Size/Lesion volume (S1)	ASTHMA	-	2.572e-05
Size/Lesion volume (S1)	AUTOIMMUNE_THYROID_DISEASE	-	8.5734e-05
Size/Lesion volume (S1)	ALLOGRAFT_REJECTION	-	1.8372e-05
Size/Lesion volume (S1)	GRAFT_VERSUS_HOST_DISEASE	-	2.1433e-05
Size/Lesion volume (S1)	VIRAL_MYOCARDITIS	-	0.0002572
Effective Diameter (S2)	N_GLYCAN_BIOSYNTHESIS	-	0.041255
Effective Diameter (S2)	OTHER_GLYCAN_DEGRADATION	-	0.00027444
Effective Diameter (S2)	GLYCOSAMINOGLYCAN_DEGRADATION	-	0.0053248
Effective Diameter (S2)	GLYCOSPHINGOLIPID_BIOSYNTHESIS_GANGLIO_SERIES	-	0.035534
Effective Diameter (S2)	DNA_REPLICATION	+	0.0041579
Effective Diameter (S2)	SPLICEOSOME	+	0.022409
Effective Diameter (S2)	BASE_EXCISION_REPAIR	+	0.043675
Effective Diameter (S2)	MISMATCH_REPAIR	+	0.031386
Effective Diameter (S2)	HOMOLOGOUS_RECOMBINATION	+	0.0001099
Effective Diameter (S2)	NON_HOMOLOGOUS_END_JOINING	+	0.011093
Effective Diameter (S2)	CYTOKINE_CYTOKINE_RECEPTOR_INTERACTION	-	0
Effective Diameter (S2)	CHEMOKINE_SIGNALING_PATHWAY	-	0.0044313
Effective Diameter (S2)	NEUROACTIVE_LIGAND_RECEPTOR_INTERACTION	-	0.0025654
Effective Diameter (S2)	CELL_CYCLE	+	7.3267e-05
Effective Diameter (S2)	OOCYTE_MEIOSIS	+	0.015899
Effective Diameter (S2)	SNARE_INTERACTIONS_IN_VESICULAR_TRANSPORT	-	0.042783
Effective Diameter (S2)	LYSOSOME	-	0.00024325
Effective Diameter (S2)	PEROXISOME	-	0.0078768
Effective Diameter (S2)	APOPTOSIS	-	0.0044676
Effective Diameter (S2)	CELL_ADHESION_MOLECULES_CAMS	-	0.00022298
Effective Diameter (S2)	COMPLEMENT_AND_COAGULATION_CASCADES	-	0
Effective Diameter (S2)	ANTIGEN_PROCESSING_AND_PRESENTATION	-	0.0077789
Effective Diameter (S2)	TOLL_LIKE_RECEPTOR_SIGNALING_PATHWAY	-	0.014345
Effective Diameter (S2)	JAK_STAT_SIGNALING_PATHWAY	-	0.0042048
Effective Diameter (S2)	HEMATOPOIETIC_CELL_LINEAGE	-	0
Effective Diameter (S2)	NATURAL_KILLER_CELL_MEDIATED_CYTOTOXICITY	-	0.0077119
Effective Diameter (S2)	B_CELL_RECEPTOR_SIGNALING_PATHWAY	-	0.011379
Effective Diameter (S2)	INTESTINAL_IMMUNE_NETWORK_FOR_IGA_PRODUCTION	-	0
Effective Diameter (S2)	TASTE_TRANSDUCTION	+	0.00097689
Effective Diameter (S2)	TYPE_I_DIABETES_MELLITUS	-	0.00054608
Effective Diameter (S2)	LEISHMANIA_INFECTION	-	1.8203e-05
Effective Diameter (S2)	ASTHMA	-	0
Effective Diameter (S2)	AUTOIMMUNE_THYROID_DISEASE	-	1.4158e-05
Effective Diameter (S2)	ALLOGRAFT_REJECTION	-	1.5927e-05
Effective Diameter (S2)	GRAFT_VERSUS_HOST_DISEASE	-	2.1236e-05
Effective Diameter (S2)	VIRAL_MYOCARDITIS	-	0.00020387
Surface Area (S3)	N_GLYCAN_BIOSYNTHESIS	-	0.038615
Surface Area (S3)	OTHER_GLYCAN_DEGRADATION	-	4.7893e-05
Surface Area (S3)	GLYCOSAMINOGLYCAN_DEGRADATION	-	0.0046369
Surface Area (S3)	GLYCOSPHINGOLIPID_BIOSYNTHESIS_GANGLIO_SERIES	-	0.038261
Surface Area (S3)	DNA_REPLICATION	+	0.013095
Surface Area (S3)	SPLICEOSOME	+	0.024241
Surface Area (S3)	BASE_EXCISION_REPAIR	+	0.049092
Surface Area (S3)	HOMOLOGOUS_RECOMBINATION	+	0.0014447
Surface Area (S3)	NON_HOMOLOGOUS_END_JOINING	+	0.036292
Surface Area (S3)	CYTOKINE_CYTOKINE_RECEPTOR_INTERACTION	-	0
Surface Area (S3)	CHEMOKINE_SIGNALING_PATHWAY	-	0.0016334
Surface Area (S3)	NEUROACTIVE_LIGAND_RECEPTOR_INTERACTION	-	0.0076524
Surface Area (S3)	CELL_CYCLE	+	0
Surface Area (S3)	OOCYTE_MEIOSIS	+	0.037883
Surface Area (S3)	SNARE_INTERACTIONS_IN_VESICULAR_TRANSPORT	-	0.048945
Surface Area (S3)	LYSOSOME	-	0.00018678
Surface Area (S3)	PEROXISOME	-	0.0081805
Surface Area (S3)	APOPTOSIS	-	0.0025181
Surface Area (S3)	CELL_ADHESION_MOLECULES_CAMS	-	2.264e-05
Surface Area (S3)	COMPLEMENT_AND_COAGULATION_CASCADES	-	0
Surface Area (S3)	ANTIGEN_PROCESSING_AND_PRESENTATION	-	0.00038186
Surface Area (S3)	TOLL_LIKE_RECEPTOR_SIGNALING_PATHWAY	-	0.0013853
Surface Area (S3)	RIG_I_LIKE_RECEPTOR_SIGNALING_PATHWAY	-	0.037453
Surface Area (S3)	CYTOSOLIC_DNA_SENSING_PATHWAY	-	0.030089
Surface Area (S3)	JAK_STAT_SIGNALING_PATHWAY	-	0.0043831
Surface Area (S3)	HEMATOPOIETIC_CELL_LINEAGE	-	0
Surface Area (S3)	NATURAL_KILLER_CELL_MEDIATED_CYTOTOXICITY	-	0.011171
Surface Area (S3)	B_CELL_RECEPTOR_SIGNALING_PATHWAY	-	0.004273
Surface Area (S3)	INTESTINAL_IMMUNE_NETWORK_FOR_IGA_PRODUCTION	-	0
Surface Area (S3)	TASTE_TRANSDUCTION	+	0.0079027
Surface Area (S3)	TYPE_I_DIABETES_MELLITUS	-	5.1884e-05
Surface Area (S3)	LEISHMANIA_INFECTION	-	0
Surface Area (S3)	ASTHMA	-	0
Surface Area (S3)	AUTOIMMUNE_THYROID_DISEASE	-	0
Surface Area (S3)	ALLOGRAFT_REJECTION	-	0
Surface Area (S3)	GRAFT_VERSUS_HOST_DISEASE	-	0
Surface Area (S3)	VIRAL_MYOCARDITIS	-	2.4904e-05
Maximum Diameter (S4)	CITRATE_CYCLE_TCA_CYCLE	-	0.0292
Maximum Diameter (S4)	VALINE_LEUCINE_AND_ISOLEUCINE_DEGRADATION	-	0.045669
Maximum Diameter (S4)	N_GLYCAN_BIOSYNTHESIS	-	0.019794
Maximum Diameter (S4)	OTHER_GLYCAN_DEGRADATION	-	6.1322e-05
Maximum Diameter (S4)	GLYCOSAMINOGLYCAN_DEGRADATION	-	7.7869e-05
Maximum Diameter (S4)	GLYCOSAMINOGLYCAN_BIOSYNTHESIS_CHONDROITIN_SULFATE	-	0.017405
Maximum Diameter (S4)	SPHINGOLIPID_METABOLISM	-	0.014561
Maximum Diameter (S4)	GLYCOSPHINGOLIPID_BIOSYNTHESIS_GANGLIO_SERIES	-	0.019668
Maximum Diameter (S4)	NICOTINATE_AND_NICOTINAMIDE_METABOLISM	-	0.040793
Maximum Diameter (S4)	RNA_DEGRADATION	+	0.043971
Maximum Diameter (S4)	DNA_REPLICATION	+	0.011811
Maximum Diameter (S4)	SPLICEOSOME	+	0.0036196
Maximum Diameter (S4)	PPAR_SIGNALING_PATHWAY	-	0.014186
Maximum Diameter (S4)	BASE_EXCISION_REPAIR	+	0.01861
Maximum Diameter (S4)	HOMOLOGOUS_RECOMBINATION	+	0.00090491
Maximum Diameter (S4)	MAPK_SIGNALING_PATHWAY	-	0.044994
Maximum Diameter (S4)	CYTOKINE_CYTOKINE_RECEPTOR_INTERACTION	-	0
Maximum Diameter (S4)	CHEMOKINE_SIGNALING_PATHWAY	-	0
Maximum Diameter (S4)	NEUROACTIVE_LIGAND_RECEPTOR_INTERACTION	-	0.0010618
Maximum Diameter (S4)	CELL_CYCLE	+	0.00031204
Maximum Diameter (S4)	LYSOSOME	-	0
Maximum Diameter (S4)	PEROXISOME	-	0.013695
Maximum Diameter (S4)	APOPTOSIS	-	0
Maximum Diameter (S4)	CELL_ADHESION_MOLECULES_CAMS	-	0
Maximum Diameter (S4)	COMPLEMENT_AND_COAGULATION_CASCADES	-	0
Maximum Diameter (S4)	ANTIGEN_PROCESSING_AND_PRESENTATION	-	6.4549e-05
Maximum Diameter (S4)	TOLL_LIKE_RECEPTOR_SIGNALING_PATHWAY	-	0
Maximum Diameter (S4)	NOD_LIKE_RECEPTOR_SIGNALING_PATHWAY	-	0.016037
Maximum Diameter (S4)	RIG_I_LIKE_RECEPTOR_SIGNALING_PATHWAY	-	0.013874
Maximum Diameter (S4)	CYTOSOLIC_DNA_SENSING_PATHWAY	-	0.031587
Maximum Diameter (S4)	JAK_STAT_SIGNALING_PATHWAY	-	7.4329e-05
Maximum Diameter (S4)	HEMATOPOIETIC_CELL_LINEAGE	-	0
Maximum Diameter (S4)	NATURAL_KILLER_CELL_MEDIATED_CYTOTOXICITY	-	0
Maximum Diameter (S4)	T_CELL_RECEPTOR_SIGNALING_PATHWAY	-	0.018501
Maximum Diameter (S4)	B_CELL_RECEPTOR_SIGNALING_PATHWAY	-	6.0564e-05
Maximum Diameter (S4)	FC_GAMMA_R_MEDIATED_PHAGOCYTOSIS	-	0.016361
Maximum Diameter (S4)	LEUKOCYTE_TRANSENDOTHELIAL_MIGRATION	-	0.00081762
Maximum Diameter (S4)	INTESTINAL_IMMUNE_NETWORK_FOR_IGA_PRODUCTION	-	0
Maximum Diameter (S4)	TASTE_TRANSDUCTION	+	0.022893
Maximum Diameter (S4)	TYPE_I_DIABETES_MELLITUS	-	0
Maximum Diameter (S4)	AMYOTROPHIC_LATERAL_SCLEROSIS_ALS	-	0.0255
Maximum Diameter (S4)	PRION_DISEASES	-	0.0031996
Maximum Diameter (S4)	PATHOGENIC_ESCHERICHIA_COLI_INFECTION	-	0.025748
Maximum Diameter (S4)	LEISHMANIA_INFECTION	-	0
Maximum Diameter (S4)	ASTHMA	-	0
Maximum Diameter (S4)	AUTOIMMUNE_THYROID_DISEASE	-	0
Maximum Diameter (S4)	SYSTEMIC_LUPUS_ERYTHEMATOSUS	-	0.032499
Maximum Diameter (S4)	ALLOGRAFT_REJECTION	-	0
Maximum Diameter (S4)	GRAFT_VERSUS_HOST_DISEASE	-	0
Maximum Diameter (S4)	PRIMARY_IMMUNODEFICIENCY	-	0.013927
Maximum Diameter (S4)	VIRAL_MYOCARDITIS	-	0
Sphericity (G1)	N_GLYCAN_BIOSYNTHESIS	+	0.033551
Sphericity (G1)	OTHER_GLYCAN_DEGRADATION	+	0.034611
Sphericity (G1)	AMINO_SUGAR_AND_NUCLEOTIDE_SUGAR_METABOLISM	+	0.017543
Sphericity (G1)	SPHINGOLIPID_METABOLISM	+	0.032613
Sphericity (G1)	GLYCOSPHINGOLIPID_BIOSYNTHESIS_LACTO_AND_NEOLACTO_SERIES	+	0.0045308
Sphericity (G1)	GLYCOSPHINGOLIPID_BIOSYNTHESIS_GLOBO_SERIES	+	0.033182
Sphericity (G1)	GLYCOSPHINGOLIPID_BIOSYNTHESIS_GANGLIO_SERIES	+	0.048379
Sphericity (G1)	CYTOKINE_CYTOKINE_RECEPTOR_INTERACTION	+	0
Sphericity (G1)	CHEMOKINE_SIGNALING_PATHWAY	+	0.00034355
Sphericity (G1)	LYSOSOME	+	0.00020041
Sphericity (G1)	APOPTOSIS	+	0.0029638
Sphericity (G1)	CELL_ADHESION_MOLECULES_CAMS	+	0
Sphericity (G1)	ANTIGEN_PROCESSING_AND_PRESENTATION	+	0
Sphericity (G1)	TOLL_LIKE_RECEPTOR_SIGNALING_PATHWAY	+	0
Sphericity (G1)	NOD_LIKE_RECEPTOR_SIGNALING_PATHWAY	+	0.033473
Sphericity (G1)	RIG_I_LIKE_RECEPTOR_SIGNALING_PATHWAY	+	0.048799
Sphericity (G1)	CYTOSOLIC_DNA_SENSING_PATHWAY	+	0.00036073
Sphericity (G1)	JAK_STAT_SIGNALING_PATHWAY	+	0.0092897
Sphericity (G1)	HEMATOPOIETIC_CELL_LINEAGE	+	2.1137e-05
Sphericity (G1)	NATURAL_KILLER_CELL_MEDIATED_CYTOTOXICITY	+	0
Sphericity (G1)	T_CELL_RECEPTOR_SIGNALING_PATHWAY	+	0.0034946
Sphericity (G1)	B_CELL_RECEPTOR_SIGNALING_PATHWAY	+	0.00037972
Sphericity (G1)	FC_GAMMA_R_MEDIATED_PHAGOCYTOSIS	+	0.00034843
Sphericity (G1)	LEUKOCYTE_TRANSENDOTHELIAL_MIGRATION	+	0.0004117
Sphericity (G1)	INTESTINAL_IMMUNE_NETWORK_FOR_IGA_PRODUCTION	+	0
Sphericity (G1)	REGULATION_OF_ACTIN_CYTOSKELETON	+	0.013572
Sphericity (G1)	TYPE_I_DIABETES_MELLITUS	+	0
Sphericity (G1)	PATHOGENIC_ESCHERICHIA_COLI_INFECTION	+	3.9787e-05
Sphericity (G1)	LEISHMANIA_INFECTION	+	0
Sphericity (G1)	ASTHMA	+	0
Sphericity (G1)	AUTOIMMUNE_THYROID_DISEASE	+	0
Sphericity (G1)	SYSTEMIC_LUPUS_ERYTHEMATOSUS	+	0
Sphericity (G1)	ALLOGRAFT_REJECTION	+	0
Sphericity (G1)	GRAFT_VERSUS_HOST_DISEASE	+	0
Sphericity (G1)	PRIMARY_IMMUNODEFICIENCY	+	0
Sphericity (G1)	VIRAL_MYOCARDITIS	+	0
Irregularity (G2)	OXIDATIVE_PHOSPHORYLATION	+	0.044293
Irregularity (G2)	OTHER_GLYCAN_DEGRADATION	-	0.0043444
Irregularity (G2)	AMINO_SUGAR_AND_NUCLEOTIDE_SUGAR_METABOLISM	-	0.0037704
Irregularity (G2)	SPHINGOLIPID_METABOLISM	-	0.024906
Irregularity (G2)	CYTOKINE_CYTOKINE_RECEPTOR_INTERACTION	-	0
Irregularity (G2)	CHEMOKINE_SIGNALING_PATHWAY	-	0.0050075
Irregularity (G2)	CELL_CYCLE	+	0.040809
Irregularity (G2)	LYSOSOME	-	0.00061453
Irregularity (G2)	APOPTOSIS	-	2.3153e-05
Irregularity (G2)	CELL_ADHESION_MOLECULES_CAMS	-	0
Irregularity (G2)	COMPLEMENT_AND_COAGULATION_CASCADES	-	0.0077692
Irregularity (G2)	ANTIGEN_PROCESSING_AND_PRESENTATION	-	0
Irregularity (G2)	TOLL_LIKE_RECEPTOR_SIGNALING_PATHWAY	-	0.00058861
Irregularity (G2)	NOD_LIKE_RECEPTOR_SIGNALING_PATHWAY	-	0.013348
Irregularity (G2)	CYTOSOLIC_DNA_SENSING_PATHWAY	-	0.0026811
Irregularity (G2)	HEMATOPOIETIC_CELL_LINEAGE	-	0.0001075
Irregularity (G2)	NATURAL_KILLER_CELL_MEDIATED_CYTOTOXICITY	-	2.5083e-05
Irregularity (G2)	T_CELL_RECEPTOR_SIGNALING_PATHWAY	-	0.038759
Irregularity (G2)	B_CELL_RECEPTOR_SIGNALING_PATHWAY	-	0.0019004
Irregularity (G2)	INTESTINAL_IMMUNE_NETWORK_FOR_IGA_PRODUCTION	-	0
Irregularity (G2)	TYPE_I_DIABETES_MELLITUS	-	0
Irregularity (G2)	LEISHMANIA_INFECTION	-	0
Irregularity (G2)	ASTHMA	-	0
Irregularity (G2)	AUTOIMMUNE_THYROID_DISEASE	-	0
Irregularity (G2)	ALLOGRAFT_REJECTION	-	0
Irregularity (G2)	GRAFT_VERSUS_HOST_DISEASE	-	0
Irregularity (G2)	PRIMARY_IMMUNODEFICIENCY	-	0.0048255
Irregularity (G2)	VIRAL_MYOCARDITIS	-	0
Surface Area to Volume ratio (G3)	STEROID_BIOSYNTHESIS	-	0.045306
Surface Area to Volume ratio (G3)	LYSINE_DEGRADATION	-	0.046443
Surface Area to Volume ratio (G3)	GLYCOSPHINGOLIPID_BIOSYNTHESIS_LACTO_AND_NEOLACTO_SERIES	-	0.0016651
Surface Area to Volume ratio (G3)	CYTOKINE_CYTOKINE_RECEPTOR_INTERACTION	-	0.0058278
Surface Area to Volume ratio (G3)	APOPTOSIS	-	0.049917
Surface Area to Volume ratio (G3)	CELL_ADHESION_MOLECULES_CAMS	-	0.00036957
Surface Area to Volume ratio (G3)	ANTIGEN_PROCESSING_AND_PRESENTATION	-	0
Surface Area to Volume ratio (G3)	TOLL_LIKE_RECEPTOR_SIGNALING_PATHWAY	-	0.00081839
Surface Area to Volume ratio (G3)	NATURAL_KILLER_CELL_MEDIATED_CYTOTOXICITY	-	0.0017057
Surface Area to Volume ratio (G3)	T_CELL_RECEPTOR_SIGNALING_PATHWAY	-	0.012141
Surface Area to Volume ratio (G3)	FC_GAMMA_R_MEDIATED_PHAGOCYTOSIS	-	0.044354
Surface Area to Volume ratio (G3)	INTESTINAL_IMMUNE_NETWORK_FOR_IGA_PRODUCTION	-	0
Surface Area to Volume ratio (G3)	TYPE_I_DIABETES_MELLITUS	-	9.4761e-05
Surface Area to Volume ratio (G3)	LEISHMANIA_INFECTION	-	0.00012184
Surface Area to Volume ratio (G3)	ASTHMA	-	0.003064
Surface Area to Volume ratio (G3)	AUTOIMMUNE_THYROID_DISEASE	-	0
Surface Area to Volume ratio (G3)	SYSTEMIC_LUPUS_ERYTHEMATOSUS	-	0.00010661
Surface Area to Volume ratio (G3)	ALLOGRAFT_REJECTION	-	0
Surface Area to Volume ratio (G3)	GRAFT_VERSUS_HOST_DISEASE	-	0
Surface Area to Volume ratio (G3)	PRIMARY_IMMUNODEFICIENCY	-	0
Surface Area to Volume ratio (G3)	VIRAL_MYOCARDITIS	-	0.0010977
Margin Sharpness (M1)	GLYCOSPHINGOLIPID_BIOSYNTHESIS_LACTO_AND_NEOLACTO_SERIES	+	0.021573
Margin Sharpness (M1)	PROTEIN_EXPORT	+	0.02154
Margin Sharpness (M1)	CYTOKINE_CYTOKINE_RECEPTOR_INTERACTION	+	0
Margin Sharpness (M1)	CHEMOKINE_SIGNALING_PATHWAY	+	0.00075461
Margin Sharpness (M1)	APOPTOSIS	+	0.012938
Margin Sharpness (M1)	CELL_ADHESION_MOLECULES_CAMS	+	0
Margin Sharpness (M1)	ANTIGEN_PROCESSING_AND_PRESENTATION	+	0.019499
Margin Sharpness (M1)	JAK_STAT_SIGNALING_PATHWAY	+	0.0018781
Margin Sharpness (M1)	HEMATOPOIETIC_CELL_LINEAGE	+	0
Margin Sharpness (M1)	NATURAL_KILLER_CELL_MEDIATED_CYTOTOXICITY	+	0.015127
Margin Sharpness (M1)	INTESTINAL_IMMUNE_NETWORK_FOR_IGA_PRODUCTION	+	0
Margin Sharpness (M1)	TYPE_I_DIABETES_MELLITUS	+	0.015717
Margin Sharpness (M1)	ALDOSTERONE_REGULATED_SODIUM_REABSORPTION	+	0.029732
Margin Sharpness (M1)	LEISHMANIA_INFECTION	+	0.0063387
Margin Sharpness (M1)	ASTHMA	+	0.013872
Margin Sharpness (M1)	AUTOIMMUNE_THYROID_DISEASE	+	0.00015092
Margin Sharpness (M1)	ALLOGRAFT_REJECTION	+	0.0004312
Margin Sharpness (M1)	GRAFT_VERSUS_HOST_DISEASE	+	0.00017607
Margin Sharpness (M1)	VIRAL_MYOCARDITIS	+	0.021459
Variance of Margin Sharpness (M2)	VALINE_LEUCINE_AND_ISOLEUCINE_DEGRADATION	-	0
Variance of Margin Sharpness (M2)	PYRUVATE_METABOLISM	-	0.04955
Variance of Margin Sharpness (M2)	CIRCADIAN_RHYTHM_MAMMAL	+	0.047554
Variance of Radial Gradient Histogram (vRGH) (M3)	CITRATE_CYCLE_TCA_CYCLE	+	0.036827
Variance of Radial Gradient Histogram (vRGH) (M3)	STEROID_BIOSYNTHESIS	+	0.020331
Variance of Radial Gradient Histogram (vRGH) (M3)	N_GLYCAN_BIOSYNTHESIS	+	0.028508
Variance of Radial Gradient Histogram (vRGH) (M3)	OTHER_GLYCAN_DEGRADATION	+	0.0070616
Variance of Radial Gradient Histogram (vRGH) (M3)	O_GLYCAN_BIOSYNTHESIS	+	0.0084528
Variance of Radial Gradient Histogram (vRGH) (M3)	AMINO_SUGAR_AND_NUCLEOTIDE_SUGAR_METABOLISM	+	0.0011464
Variance of Radial Gradient Histogram (vRGH) (M3)	GLYCOSAMINOGLYCAN_DEGRADATION	+	0.0084316
Variance of Radial Gradient Histogram (vRGH) (M3)	SPHINGOLIPID_METABOLISM	+	0.0081103
Variance of Radial Gradient Histogram (vRGH) (M3)	TERPENOID_BACKBONE_BIOSYNTHESIS	+	0.031577
Variance of Radial Gradient Histogram (vRGH) (M3)	LYSOSOME	+	5.5247e-05
Variance of Radial Gradient Histogram (vRGH) (M3)	PEROXISOME	+	0.010815
Variance of Radial Gradient Histogram (vRGH) (M3)	CELL_ADHESION_MOLECULES_CAMS	+	0.006777
Variance of Radial Gradient Histogram (vRGH) (M3)	ANTIGEN_PROCESSING_AND_PRESENTATION	+	0
Variance of Radial Gradient Histogram (vRGH) (M3)	TOLL_LIKE_RECEPTOR_SIGNALING_PATHWAY	+	0.023993
Variance of Radial Gradient Histogram (vRGH) (M3)	TASTE_TRANSDUCTION	-	0.02816
Variance of Radial Gradient Histogram (vRGH) (M3)	TYPE_I_DIABETES_MELLITUS	+	0.0011418
Variance of Radial Gradient Histogram (vRGH) (M3)	PARKINSONS_DISEASE	+	0.02043
Variance of Radial Gradient Histogram (vRGH) (M3)	PATHOGENIC_ESCHERICHIA_COLI_INFECTION	+	0.044145
Variance of Radial Gradient Histogram (vRGH) (M3)	LEISHMANIA_INFECTION	+	0.017881
Variance of Radial Gradient Histogram (vRGH) (M3)	ASTHMA	+	0.00071821
Variance of Radial Gradient Histogram (vRGH) (M3)	AUTOIMMUNE_THYROID_DISEASE	+	0.00014733
Variance of Radial Gradient Histogram (vRGH) (M3)	SYSTEMIC_LUPUS_ERYTHEMATOSUS	+	0.00064718
Variance of Radial Gradient Histogram (vRGH) (M3)	ALLOGRAFT_REJECTION	+	0.00035911
Variance of Radial Gradient Histogram (vRGH) (M3)	GRAFT_VERSUS_HOST_DISEASE	+	0.0039888
Variance of Radial Gradient Histogram (vRGH) (M3)	PRIMARY_IMMUNODEFICIENCY	+	0.017133
Variance of Radial Gradient Histogram (vRGH) (M3)	VIRAL_MYOCARDITIS	+	0.00061877
Contrast (T1)	STEROID_BIOSYNTHESIS	-	0.0087479
Contrast (T1)	STEROID_HORMONE_BIOSYNTHESIS	-	0.018882
Contrast (T1)	GLYCOSYLPHOSPHATIDYLINOSITOL_GPI_ANCHOR_BIOSYNTHESIS	-	0.017021
Contrast (T1)	PORPHYRIN_AND_CHLOROPHYLL_METABOLISM	-	0.044753
Contrast (T1)	TERPENOID_BACKBONE_BIOSYNTHESIS	-	0.013246
Contrast (T1)	BIOSYNTHESIS_OF_UNSATURATED_FATTY_ACIDS	-	0.035858
Contrast (T1)	RIBOSOME	+	0
Contrast (T1)	CYTOKINE_CYTOKINE_RECEPTOR_INTERACTION	+	3.4149e-05
Contrast (T1)	CHEMOKINE_SIGNALING_PATHWAY	+	7.1713e-05
Contrast (T1)	PEROXISOME	-	0.011416
Contrast (T1)	VEGF_SIGNALING_PATHWAY	+	0.026343
Contrast (T1)	CELL_ADHESION_MOLECULES_CAMS	+	0.042186
Contrast (T1)	ANTIGEN_PROCESSING_AND_PRESENTATION	+	0.031505
Contrast (T1)	TOLL_LIKE_RECEPTOR_SIGNALING_PATHWAY	+	0.006
Contrast (T1)	NOD_LIKE_RECEPTOR_SIGNALING_PATHWAY	+	0.0036454
Contrast (T1)	RIG_I_LIKE_RECEPTOR_SIGNALING_PATHWAY	+	0.043421
Contrast (T1)	JAK_STAT_SIGNALING_PATHWAY	+	0.010469
Contrast (T1)	HEMATOPOIETIC_CELL_LINEAGE	+	2.988e-05
Contrast (T1)	NATURAL_KILLER_CELL_MEDIATED_CYTOTOXICITY	+	2.656e-05
Contrast (T1)	T_CELL_RECEPTOR_SIGNALING_PATHWAY	+	0.0098448
Contrast (T1)	B_CELL_RECEPTOR_SIGNALING_PATHWAY	+	0.0012151
Contrast (T1)	FC_EPSILON_RI_SIGNALING_PATHWAY	+	0.0070294
Contrast (T1)	INTESTINAL_IMMUNE_NETWORK_FOR_IGA_PRODUCTION	+	0
Contrast (T1)	TYPE_I_DIABETES_MELLITUS	+	0.00049982
Contrast (T1)	PRION_DISEASES	+	0.040279
Contrast (T1)	LEISHMANIA_INFECTION	+	0
Contrast (T1)	ASTHMA	+	0.0011217
Contrast (T1)	AUTOIMMUNE_THYROID_DISEASE	+	0
Contrast (T1)	ALLOGRAFT_REJECTION	+	0
Contrast (T1)	GRAFT_VERSUS_HOST_DISEASE	+	0
Contrast (T1)	PRIMARY_IMMUNODEFICIENCY	+	0.010279
Contrast (T1)	VIRAL_MYOCARDITIS	+	0.032174
Correlation (T2)	STEROID_BIOSYNTHESIS	+	0.0057539
Correlation (T2)	STEROID_HORMONE_BIOSYNTHESIS	+	0.021021
Correlation (T2)	GLYCOSYLPHOSPHATIDYLINOSITOL_GPI_ANCHOR_BIOSYNTHESIS	+	0.009518
Correlation (T2)	TERPENOID_BACKBONE_BIOSYNTHESIS	+	0.006681
Correlation (T2)	BIOSYNTHESIS_OF_UNSATURATED_FATTY_ACIDS	+	0.049692
Correlation (T2)	RIBOSOME	-	0
Correlation (T2)	CYTOKINE_CYTOKINE_RECEPTOR_INTERACTION	-	0.00049249
Correlation (T2)	CHEMOKINE_SIGNALING_PATHWAY	-	0.00074172
Correlation (T2)	PEROXISOME	+	0.0080555
Correlation (T2)	VEGF_SIGNALING_PATHWAY	-	0.033076
Correlation (T2)	TOLL_LIKE_RECEPTOR_SIGNALING_PATHWAY	-	0.0091513
Correlation (T2)	NOD_LIKE_RECEPTOR_SIGNALING_PATHWAY	-	0.0065217
Correlation (T2)	JAK_STAT_SIGNALING_PATHWAY	-	0.031956
Correlation (T2)	HEMATOPOIETIC_CELL_LINEAGE	-	0.0004701
Correlation (T2)	NATURAL_KILLER_CELL_MEDIATED_CYTOTOXICITY	-	0.00082413
Correlation (T2)	T_CELL_RECEPTOR_SIGNALING_PATHWAY	-	0.023063
Correlation (T2)	B_CELL_RECEPTOR_SIGNALING_PATHWAY	-	0.0051189
Correlation (T2)	FC_EPSILON_RI_SIGNALING_PATHWAY	-	0.018713
Correlation (T2)	INTESTINAL_IMMUNE_NETWORK_FOR_IGA_PRODUCTION	-	0.00022983
Correlation (T2)	TYPE_I_DIABETES_MELLITUS	-	0.0028681
Correlation (T2)	PRION_DISEASES	-	0.047036
Correlation (T2)	LEISHMANIA_INFECTION	-	0
Correlation (T2)	ASTHMA	-	0.0050305
Correlation (T2)	AUTOIMMUNE_THYROID_DISEASE	-	0.00022635
Correlation (T2)	ALLOGRAFT_REJECTION	-	0
Correlation (T2)	GRAFT_VERSUS_HOST_DISEASE	-	0
Difference Entropy (T3)	STEROID_BIOSYNTHESIS	-	0.010354
Difference Entropy (T3)	STEROID_HORMONE_BIOSYNTHESIS	-	0.019646
Difference Entropy (T3)	GLYCOSYLPHOSPHATIDYLINOSITOL_GPI_ANCHOR_BIOSYNTHESIS	-	0.021631
Difference Entropy (T3)	PORPHYRIN_AND_CHLOROPHYLL_METABOLISM	-	0.033043
Difference Entropy (T3)	TERPENOID_BACKBONE_BIOSYNTHESIS	-	0.026201
Difference Entropy (T3)	RIBOSOME	+	0
Difference Entropy (T3)	CYTOKINE_CYTOKINE_RECEPTOR_INTERACTION	+	0.00020973
Difference Entropy (T3)	CHEMOKINE_SIGNALING_PATHWAY	+	0.00043303
Difference Entropy (T3)	PEROXISOME	-	0.019148
Difference Entropy (T3)	VEGF_SIGNALING_PATHWAY	+	0.018842
Difference Entropy (T3)	ANTIGEN_PROCESSING_AND_PRESENTATION	+	0.029226
Difference Entropy (T3)	TOLL_LIKE_RECEPTOR_SIGNALING_PATHWAY	+	0.0041971
Difference Entropy (T3)	NOD_LIKE_RECEPTOR_SIGNALING_PATHWAY	+	0.00161
Difference Entropy (T3)	RIG_I_LIKE_RECEPTOR_SIGNALING_PATHWAY	+	0.030265
Difference Entropy (T3)	JAK_STAT_SIGNALING_PATHWAY	+	0.018957
Difference Entropy (T3)	HEMATOPOIETIC_CELL_LINEAGE	+	5.5517e-05
Difference Entropy (T3)	NATURAL_KILLER_CELL_MEDIATED_CYTOTOXICITY	+	8.3275e-05
Difference Entropy (T3)	T_CELL_RECEPTOR_SIGNALING_PATHWAY	+	0.0073804
Difference Entropy (T3)	B_CELL_RECEPTOR_SIGNALING_PATHWAY	+	0.00081424
Difference Entropy (T3)	FC_EPSILON_RI_SIGNALING_PATHWAY	+	0.005281
Difference Entropy (T3)	INTESTINAL_IMMUNE_NETWORK_FOR_IGA_PRODUCTION	+	0
Difference Entropy (T3)	TYPE_I_DIABETES_MELLITUS	+	0.00080751
Difference Entropy (T3)	LEISHMANIA_INFECTION	+	0
Difference Entropy (T3)	ASTHMA	+	0.0013409
Difference Entropy (T3)	AUTOIMMUNE_THYROID_DISEASE	+	4.7586e-05
Difference Entropy (T3)	ALLOGRAFT_REJECTION	+	0
Difference Entropy (T3)	GRAFT_VERSUS_HOST_DISEASE	+	0
Difference Entropy (T3)	PRIMARY_IMMUNODEFICIENCY	+	0.013034
Difference Entropy (T3)	VIRAL_MYOCARDITIS	+	0.029853
Difference Variance (T4)	STEROID_BIOSYNTHESIS	-	0.010985
Difference Variance (T4)	GLYCOSYLPHOSPHATIDYLINOSITOL_GPI_ANCHOR_BIOSYNTHESIS	-	0.020411
Difference Variance (T4)	TERPENOID_BACKBONE_BIOSYNTHESIS	-	0.032338
Difference Variance (T4)	RIBOSOME	+	0
Difference Variance (T4)	CYTOKINE_CYTOKINE_RECEPTOR_INTERACTION	+	3.2272e-05
Difference Variance (T4)	CHEMOKINE_SIGNALING_PATHWAY	+	0.00033886
Difference Variance (T4)	PEROXISOME	-	0.013235
Difference Variance (T4)	VEGF_SIGNALING_PATHWAY	+	0.01439
Difference Variance (T4)	CELL_ADHESION_MOLECULES_CAMS	+	0.048446
Difference Variance (T4)	TOLL_LIKE_RECEPTOR_SIGNALING_PATHWAY	+	0.011101
Difference Variance (T4)	NOD_LIKE_RECEPTOR_SIGNALING_PATHWAY	+	0.011613
Difference Variance (T4)	JAK_STAT_SIGNALING_PATHWAY	+	0.011382
Difference Variance (T4)	HEMATOPOIETIC_CELL_LINEAGE	+	0.00021336
Difference Variance (T4)	NATURAL_KILLER_CELL_MEDIATED_CYTOTOXICITY	+	2.8238e-05
Difference Variance (T4)	T_CELL_RECEPTOR_SIGNALING_PATHWAY	+	0.0040663
Difference Variance (T4)	B_CELL_RECEPTOR_SIGNALING_PATHWAY	+	0.0029107
Difference Variance (T4)	FC_EPSILON_RI_SIGNALING_PATHWAY	+	0.01098
Difference Variance (T4)	INTESTINAL_IMMUNE_NETWORK_FOR_IGA_PRODUCTION	+	0
Difference Variance (T4)	TYPE_I_DIABETES_MELLITUS	+	0.001779
Difference Variance (T4)	PATHOGENIC_ESCHERICHIA_COLI_INFECTION	+	0.049304
Difference Variance (T4)	LEISHMANIA_INFECTION	+	0
Difference Variance (T4)	ASTHMA	+	0.0018791
Difference Variance (T4)	AUTOIMMUNE_THYROID_DISEASE	+	0
Difference Variance (T4)	ALLOGRAFT_REJECTION	+	0
Difference Variance (T4)	GRAFT_VERSUS_HOST_DISEASE	+	0
Difference Variance (T4)	PRIMARY_IMMUNODEFICIENCY	+	0.0046386
Energy (T5)	PENTOSE_AND_GLUCURONATE_INTERCONVERSIONS	+	0.027672
Energy (T5)	STEROID_BIOSYNTHESIS	+	0.017968
Energy (T5)	STEROID_HORMONE_BIOSYNTHESIS	+	0.00099152
Energy (T5)	GLYCOSYLPHOSPHATIDYLINOSITOL_GPI_ANCHOR_BIOSYNTHESIS	+	0.021723
Energy (T5)	RIBOSOME	-	0
Energy (T5)	CYTOKINE_CYTOKINE_RECEPTOR_INTERACTION	-	0.00032971
Energy (T5)	CHEMOKINE_SIGNALING_PATHWAY	-	0.0047857
Energy (T5)	TOLL_LIKE_RECEPTOR_SIGNALING_PATHWAY	-	0.030788
Energy (T5)	NOD_LIKE_RECEPTOR_SIGNALING_PATHWAY	-	0.042085
Energy (T5)	HEMATOPOIETIC_CELL_LINEAGE	-	0.0014532
Energy (T5)	NATURAL_KILLER_CELL_MEDIATED_CYTOTOXICITY	-	0.0079221
Energy (T5)	B_CELL_RECEPTOR_SIGNALING_PATHWAY	-	0.018751
Energy (T5)	INTESTINAL_IMMUNE_NETWORK_FOR_IGA_PRODUCTION	-	0
Energy (T5)	TYPE_I_DIABETES_MELLITUS	-	0.0038576
Energy (T5)	LEISHMANIA_INFECTION	-	0
Energy (T5)	ASTHMA	-	0.00039251
Energy (T5)	AUTOIMMUNE_THYROID_DISEASE	-	0.0012776
Energy (T5)	ALLOGRAFT_REJECTION	-	0.00015386
Energy (T5)	GRAFT_VERSUS_HOST_DISEASE	-	0
Entropy (T6)	PENTOSE_AND_GLUCURONATE_INTERCONVERSIONS	-	0.041196
Entropy (T6)	STEROID_BIOSYNTHESIS	-	0.012327
Entropy (T6)	STEROID_HORMONE_BIOSYNTHESIS	-	0.017741
Entropy (T6)	GLYCOSYLPHOSPHATIDYLINOSITOL_GPI_ANCHOR_BIOSYNTHESIS	-	0.012268
Entropy (T6)	TERPENOID_BACKBONE_BIOSYNTHESIS	-	0.041218
Entropy (T6)	RIBOSOME	+	0
Entropy (T6)	CYTOKINE_CYTOKINE_RECEPTOR_INTERACTION	+	4.8392e-05
Entropy (T6)	CHEMOKINE_SIGNALING_PATHWAY	+	0.00070258
Entropy (T6)	TOLL_LIKE_RECEPTOR_SIGNALING_PATHWAY	+	0.013501
Entropy (T6)	NOD_LIKE_RECEPTOR_SIGNALING_PATHWAY	+	0.019602
Entropy (T6)	HEMATOPOIETIC_CELL_LINEAGE	+	0.00062103
Entropy (T6)	NATURAL_KILLER_CELL_MEDIATED_CYTOTOXICITY	+	0.0016424
Entropy (T6)	T_CELL_RECEPTOR_SIGNALING_PATHWAY	+	0.042607
Entropy (T6)	B_CELL_RECEPTOR_SIGNALING_PATHWAY	+	0.012959
Entropy (T6)	FC_EPSILON_RI_SIGNALING_PATHWAY	+	0.030248
Entropy (T6)	INTESTINAL_IMMUNE_NETWORK_FOR_IGA_PRODUCTION	+	6.7749e-05
Entropy (T6)	TYPE_I_DIABETES_MELLITUS	+	0.0019666
Entropy (T6)	PRION_DISEASES	+	0.023056
Entropy (T6)	LEISHMANIA_INFECTION	+	0
Entropy (T6)	ASTHMA	+	0.0018066
Entropy (T6)	AUTOIMMUNE_THYROID_DISEASE	+	5.6457e-05
Entropy (T6)	ALLOGRAFT_REJECTION	+	0
Entropy (T6)	GRAFT_VERSUS_HOST_DISEASE	+	0
Inverse difference moment (homogeneity) (T7)	STEROID_BIOSYNTHESIS	+	0.00076338
Inverse difference moment (homogeneity) (T7)	STEROID_HORMONE_BIOSYNTHESIS	+	0.00057253
Inverse difference moment (homogeneity) (T7)	GLYCOSYLPHOSPHATIDYLINOSITOL_GPI_ANCHOR_BIOSYNTHESIS	+	0.017939
Inverse difference moment (homogeneity) (T7)	TERPENOID_BACKBONE_BIOSYNTHESIS	+	0.0048983
Inverse difference moment (homogeneity) (T7)	BIOSYNTHESIS_OF_UNSATURATED_FATTY_ACIDS	+	0.021661
Inverse difference moment (homogeneity) (T7)	RIBOSOME	-	0
Inverse difference moment (homogeneity) (T7)	MAPK_SIGNALING_PATHWAY	-	0.037367
Inverse difference moment (homogeneity) (T7)	CYTOKINE_CYTOKINE_RECEPTOR_INTERACTION	-	6.9878e-05
Inverse difference moment (homogeneity) (T7)	CHEMOKINE_SIGNALING_PATHWAY	-	7.8613e-05
Inverse difference moment (homogeneity) (T7)	PEROXISOME	+	0.027736
Inverse difference moment (homogeneity) (T7)	APOPTOSIS	-	0.015193
Inverse difference moment (homogeneity) (T7)	VEGF_SIGNALING_PATHWAY	-	0.019441
Inverse difference moment (homogeneity) (T7)	ANTIGEN_PROCESSING_AND_PRESENTATION	-	0.022773
Inverse difference moment (homogeneity) (T7)	TOLL_LIKE_RECEPTOR_SIGNALING_PATHWAY	-	0.0011449
Inverse difference moment (homogeneity) (T7)	NOD_LIKE_RECEPTOR_SIGNALING_PATHWAY	-	0.002264
Inverse difference moment (homogeneity) (T7)	RIG_I_LIKE_RECEPTOR_SIGNALING_PATHWAY	-	0.0063152
Inverse difference moment (homogeneity) (T7)	JAK_STAT_SIGNALING_PATHWAY	-	0.014695
Inverse difference moment (homogeneity) (T7)	HEMATOPOIETIC_CELL_LINEAGE	-	0.00010482
Inverse difference moment (homogeneity) (T7)	NATURAL_KILLER_CELL_MEDIATED_CYTOTOXICITY	-	9.4335e-05
Inverse difference moment (homogeneity) (T7)	T_CELL_RECEPTOR_SIGNALING_PATHWAY	-	0.02143
Inverse difference moment (homogeneity) (T7)	B_CELL_RECEPTOR_SIGNALING_PATHWAY	-	0.00063843
Inverse difference moment (homogeneity) (T7)	FC_EPSILON_RI_SIGNALING_PATHWAY	-	0.015469
Inverse difference moment (homogeneity) (T7)	INTESTINAL_IMMUNE_NETWORK_FOR_IGA_PRODUCTION	-	8.9843e-05
Inverse difference moment (homogeneity) (T7)	TYPE_I_DIABETES_MELLITUS	-	0.0011093
Inverse difference moment (homogeneity) (T7)	PRION_DISEASES	-	0.039147
Inverse difference moment (homogeneity) (T7)	LEISHMANIA_INFECTION	-	0
Inverse difference moment (homogeneity) (T7)	ASTHMA	-	0.0014375
Inverse difference moment (homogeneity) (T7)	AUTOIMMUNE_THYROID_DISEASE	-	0.00012578
Inverse difference moment (homogeneity) (T7)	ALLOGRAFT_REJECTION	-	0
Inverse difference moment (homogeneity) (T7)	GRAFT_VERSUS_HOST_DISEASE	-	0
Inverse difference moment (homogeneity) (T7)	VIRAL_MYOCARDITIS	-	0.01436
IMC1 (T8)	STEROID_BIOSYNTHESIS	-	0.00098631
IMC1 (T8)	STEROID_HORMONE_BIOSYNTHESIS	-	0
IMC1 (T8)	GLYCOSYLPHOSPHATIDYLINOSITOL_GPI_ANCHOR_BIOSYNTHESIS	-	0.0089942
IMC1 (T8)	TERPENOID_BACKBONE_BIOSYNTHESIS	-	0.0099257
IMC1 (T8)	BIOSYNTHESIS_OF_UNSATURATED_FATTY_ACIDS	-	0.043006
IMC1 (T8)	RIBOSOME	+	0
IMC1 (T8)	CYTOKINE_CYTOKINE_RECEPTOR_INTERACTION	+	0.00033501
IMC1 (T8)	CHEMOKINE_SIGNALING_PATHWAY	+	0.00031978
IMC1 (T8)	PEROXISOME	-	0.01022
IMC1 (T8)	VEGF_SIGNALING_PATHWAY	+	0.030692
IMC1 (T8)	TOLL_LIKE_RECEPTOR_SIGNALING_PATHWAY	+	0.0077813
IMC1 (T8)	NOD_LIKE_RECEPTOR_SIGNALING_PATHWAY	+	0.0074692
IMC1 (T8)	JAK_STAT_SIGNALING_PATHWAY	+	0.045332
IMC1 (T8)	HEMATOPOIETIC_CELL_LINEAGE	+	0.00060403
IMC1 (T8)	NATURAL_KILLER_CELL_MEDIATED_CYTOTOXICITY	+	0.0006822
IMC1 (T8)	T_CELL_RECEPTOR_SIGNALING_PATHWAY	+	0.046043
IMC1 (T8)	B_CELL_RECEPTOR_SIGNALING_PATHWAY	+	0.0078387
IMC1 (T8)	FC_EPSILON_RI_SIGNALING_PATHWAY	+	0.039176
IMC1 (T8)	INTESTINAL_IMMUNE_NETWORK_FOR_IGA_PRODUCTION	+	0
IMC1 (T8)	TYPE_I_DIABETES_MELLITUS	+	0.0057367
IMC1 (T8)	LEISHMANIA_INFECTION	+	0
IMC1 (T8)	ASTHMA	+	0.008261
IMC1 (T8)	AUTOIMMUNE_THYROID_DISEASE	+	0.0003331
IMC1 (T8)	ALLOGRAFT_REJECTION	+	0
IMC1 (T8)	GRAFT_VERSUS_HOST_DISEASE	+	0
IMC2 (T9)	STEROID_BIOSYNTHESIS	+	0.0047761
IMC2 (T9)	STEROID_HORMONE_BIOSYNTHESIS	+	0.0005619
IMC2 (T9)	GLYCOSYLPHOSPHATIDYLINOSITOL_GPI_ANCHOR_BIOSYNTHESIS	+	0.011113
IMC2 (T9)	TERPENOID_BACKBONE_BIOSYNTHESIS	+	0.0094586
IMC2 (T9)	BIOSYNTHESIS_OF_UNSATURATED_FATTY_ACIDS	+	0.027268
IMC2 (T9)	RIBOSOME	-	0
IMC2 (T9)	CYTOKINE_CYTOKINE_RECEPTOR_INTERACTION	-	0.0007011
IMC2 (T9)	CHEMOKINE_SIGNALING_PATHWAY	-	0.00078873
IMC2 (T9)	PEROXISOME	+	0.0093462
IMC2 (T9)	VEGF_SIGNALING_PATHWAY	-	0.028454
IMC2 (T9)	ANTIGEN_PROCESSING_AND_PRESENTATION	-	0.044291
IMC2 (T9)	TOLL_LIKE_RECEPTOR_SIGNALING_PATHWAY	-	0.0074578
IMC2 (T9)	NOD_LIKE_RECEPTOR_SIGNALING_PATHWAY	-	0.00618
IMC2 (T9)	JAK_STAT_SIGNALING_PATHWAY	-	0.037608
IMC2 (T9)	HEMATOPOIETIC_CELL_LINEAGE	-	0.0013048
IMC2 (T9)	NATURAL_KILLER_CELL_MEDIATED_CYTOTOXICITY	-	0.00080974
IMC2 (T9)	T_CELL_RECEPTOR_SIGNALING_PATHWAY	-	0.03769
IMC2 (T9)	B_CELL_RECEPTOR_SIGNALING_PATHWAY	-	0.0042861
IMC2 (T9)	FC_EPSILON_RI_SIGNALING_PATHWAY	-	0.030325
IMC2 (T9)	INTESTINAL_IMMUNE_NETWORK_FOR_IGA_PRODUCTION	-	0.00017111
IMC2 (T9)	TYPE_I_DIABETES_MELLITUS	-	0.0026445
IMC2 (T9)	LEISHMANIA_INFECTION	-	0
IMC2 (T9)	ASTHMA	-	0.0038857
IMC2 (T9)	AUTOIMMUNE_THYROID_DISEASE	-	0.00058821
IMC2 (T9)	ALLOGRAFT_REJECTION	-	0
IMC2 (T9)	GRAFT_VERSUS_HOST_DISEASE	-	0
IMC2 (T9)	PRIMARY_IMMUNODEFICIENCY	-	0.042993
IMC2 (T9)	VIRAL_MYOCARDITIS	-	0.026409
Maximum Correlation Coefficient (T10)	STEROID_BIOSYNTHESIS	+	0.0033242
Maximum Correlation Coefficient (T10)	STEROID_HORMONE_BIOSYNTHESIS	+	0.0034647
Maximum Correlation Coefficient (T10)	GLYCOSYLPHOSPHATIDYLINOSITOL_GPI_ANCHOR_BIOSYNTHESIS	+	0.0079032
Maximum Correlation Coefficient (T10)	TERPENOID_BACKBONE_BIOSYNTHESIS	+	0.0069527
Maximum Correlation Coefficient (T10)	BIOSYNTHESIS_OF_UNSATURATED_FATTY_ACIDS	+	0.047897
Maximum Correlation Coefficient (T10)	RIBOSOME	-	0
Maximum Correlation Coefficient (T10)	CYTOKINE_CYTOKINE_RECEPTOR_INTERACTION	-	0.00018309
Maximum Correlation Coefficient (T10)	CHEMOKINE_SIGNALING_PATHWAY	-	0.00030854
Maximum Correlation Coefficient (T10)	PEROXISOME	+	0.0040889
Maximum Correlation Coefficient (T10)	VEGF_SIGNALING_PATHWAY	-	0.027417
Maximum Correlation Coefficient (T10)	ANTIGEN_PROCESSING_AND_PRESENTATION	-	0.028628
Maximum Correlation Coefficient (T10)	TOLL_LIKE_RECEPTOR_SIGNALING_PATHWAY	-	0.0054682
Maximum Correlation Coefficient (T10)	NOD_LIKE_RECEPTOR_SIGNALING_PATHWAY	-	0.0045924
Maximum Correlation Coefficient (T10)	RIG_I_LIKE_RECEPTOR_SIGNALING_PATHWAY	-	0.036568
Maximum Correlation Coefficient (T10)	JAK_STAT_SIGNALING_PATHWAY	-	0.014764
Maximum Correlation Coefficient (T10)	HEMATOPOIETIC_CELL_LINEAGE	-	0.0003471
Maximum Correlation Coefficient (T10)	NATURAL_KILLER_CELL_MEDIATED_CYTOTOXICITY	-	0.00046992
Maximum Correlation Coefficient (T10)	T_CELL_RECEPTOR_SIGNALING_PATHWAY	-	0.024879
Maximum Correlation Coefficient (T10)	B_CELL_RECEPTOR_SIGNALING_PATHWAY	-	0.0025276
Maximum Correlation Coefficient (T10)	FC_EPSILON_RI_SIGNALING_PATHWAY	-	0.017367
Maximum Correlation Coefficient (T10)	INTESTINAL_IMMUNE_NETWORK_FOR_IGA_PRODUCTION	-	4.272e-05
Maximum Correlation Coefficient (T10)	TYPE_I_DIABETES_MELLITUS	-	0.0024482
Maximum Correlation Coefficient (T10)	LEISHMANIA_INFECTION	-	0
Maximum Correlation Coefficient (T10)	ASTHMA	-	0.0013787
Maximum Correlation Coefficient (T10)	AUTOIMMUNE_THYROID_DISEASE	-	8.9001e-05
Maximum Correlation Coefficient (T10)	ALLOGRAFT_REJECTION	-	0
Maximum Correlation Coefficient (T10)	GRAFT_VERSUS_HOST_DISEASE	-	0
Maximum Correlation Coefficient (T10)	PRIMARY_IMMUNODEFICIENCY	-	0.027037
Maximum Correlation Coefficient (T10)	VIRAL_MYOCARDITIS	-	0.010834
Sum Average (T11)	STEROID_BIOSYNTHESIS	-	0.028921
Sum Average (T11)	RIBOSOME	-	0
Sum Average (T11)	CYTOKINE_CYTOKINE_RECEPTOR_INTERACTION	-	0.00032834
Sum Average (T11)	NOTCH_SIGNALING_PATHWAY	-	0.032947
Sum Average (T11)	CELL_ADHESION_MOLECULES_CAMS	-	0.0072457
Sum Average (T11)	ANTIGEN_PROCESSING_AND_PRESENTATION	-	0.00036939
Sum Average (T11)	TOLL_LIKE_RECEPTOR_SIGNALING_PATHWAY	-	0.011495
Sum Average (T11)	NOD_LIKE_RECEPTOR_SIGNALING_PATHWAY	-	0.033036
Sum Average (T11)	NATURAL_KILLER_CELL_MEDIATED_CYTOTOXICITY	-	0.018323
Sum Average (T11)	INTESTINAL_IMMUNE_NETWORK_FOR_IGA_PRODUCTION	-	0
Sum Average (T11)	TYPE_I_DIABETES_MELLITUS	-	0.00082086
Sum Average (T11)	LEISHMANIA_INFECTION	-	0.00058047
Sum Average (T11)	BASAL_CELL_CARCINOMA	-	0.01874
Sum Average (T11)	ASTHMA	-	0.0011082
Sum Average (T11)	AUTOIMMUNE_THYROID_DISEASE	-	0.00050791
Sum Average (T11)	SYSTEMIC_LUPUS_ERYTHEMATOSUS	-	0.0027984
Sum Average (T11)	ALLOGRAFT_REJECTION	-	0
Sum Average (T11)	GRAFT_VERSUS_HOST_DISEASE	-	0
Sum Average (T11)	PRIMARY_IMMUNODEFICIENCY	-	0.031801
Sum Average (T11)	VIRAL_MYOCARDITIS	-	0.0042274
Sum Entropy (T12)	STEROID_BIOSYNTHESIS	+	0.029311
Sum Entropy (T12)	GLYCOSYLPHOSPHATIDYLINOSITOL_GPI_ANCHOR_BIOSYNTHESIS	+	0.0011556
Sum Entropy (T12)	RIBOSOME	-	0
Sum Entropy (T12)	CYTOKINE_CYTOKINE_RECEPTOR_INTERACTION	-	0.0013172
Sum Entropy (T12)	CHEMOKINE_SIGNALING_PATHWAY	-	0.0017835
Sum Entropy (T12)	PEROXISOME	+	0.044475
Sum Entropy (T12)	CELL_ADHESION_MOLECULES_CAMS	-	0.049631
Sum Entropy (T12)	TOLL_LIKE_RECEPTOR_SIGNALING_PATHWAY	-	0.0037203
Sum Entropy (T12)	HEMATOPOIETIC_CELL_LINEAGE	-	0.0039079
Sum Entropy (T12)	NATURAL_KILLER_CELL_MEDIATED_CYTOTOXICITY	-	0.00061554
Sum Entropy (T12)	T_CELL_RECEPTOR_SIGNALING_PATHWAY	-	0.0046698
Sum Entropy (T12)	B_CELL_RECEPTOR_SIGNALING_PATHWAY	-	0.0033946
Sum Entropy (T12)	FC_EPSILON_RI_SIGNALING_PATHWAY	-	0.01855
Sum Entropy (T12)	INTESTINAL_IMMUNE_NETWORK_FOR_IGA_PRODUCTION	-	1.5783e-05
Sum Entropy (T12)	TYPE_I_DIABETES_MELLITUS	-	0.00023674
Sum Entropy (T12)	LEISHMANIA_INFECTION	-	0
Sum Entropy (T12)	ASTHMA	-	0.00017587
Sum Entropy (T12)	AUTOIMMUNE_THYROID_DISEASE	-	0
Sum Entropy (T12)	ALLOGRAFT_REJECTION	-	0
Sum Entropy (T12)	GRAFT_VERSUS_HOST_DISEASE	-	0
Sum Entropy (T12)	PRIMARY_IMMUNODEFICIENCY	-	0.00021044
Sum Entropy (T12)	VIRAL_MYOCARDITIS	-	0.019718
Sum Variance (T13)	STEROID_BIOSYNTHESIS	+	0.00097336
Sum Variance (T13)	STEROID_HORMONE_BIOSYNTHESIS	+	0.010815
Sum Variance (T13)	GLYCOSYLPHOSPHATIDYLINOSITOL_GPI_ANCHOR_BIOSYNTHESIS	+	0.0081384
Sum Variance (T13)	TERPENOID_BACKBONE_BIOSYNTHESIS	+	0.013519
Sum Variance (T13)	RIBOSOME	-	0
Sum Variance (T13)	CYTOKINE_CYTOKINE_RECEPTOR_INTERACTION	-	0.022679
Sum Variance (T13)	CHEMOKINE_SIGNALING_PATHWAY	-	0.040979
Sum Variance (T13)	PEROXISOME	+	0.010058
Sum Variance (T13)	HEMATOPOIETIC_CELL_LINEAGE	-	0.029258
Sum Variance (T13)	INTESTINAL_IMMUNE_NETWORK_FOR_IGA_PRODUCTION	-	0.020503
Sum Variance (T13)	LEISHMANIA_INFECTION	-	0.0056391
Sum Variance (T13)	ASTHMA	-	0.025204
Sum Variance (T13)	AUTOIMMUNE_THYROID_DISEASE	-	0.0076496
Sum Variance (T13)	ALLOGRAFT_REJECTION	-	0.0043673
Sum Variance (T13)	GRAFT_VERSUS_HOST_DISEASE	-	0.0028962
Sum of squares (Variance) (T14)	GLYCOSAMINOGLYCAN_DEGRADATION	+	0.039594
Sum of squares (Variance) (T14)	GLYCOSPHINGOLIPID_BIOSYNTHESIS_GANGLIO_SERIES	+	0.02762
Sum of squares (Variance) (T14)	ONE_CARBON_POOL_BY_FOLATE	-	0.037527
Sum of squares (Variance) (T14)	RIBOSOME	-	0
Sum of squares (Variance) (T14)	DNA_REPLICATION	-	0.0022788
Sum of squares (Variance) (T14)	PPAR_SIGNALING_PATHWAY	+	0.032934
Sum of squares (Variance) (T14)	MISMATCH_REPAIR	-	0.0040914
Sum of squares (Variance) (T14)	HOMOLOGOUS_RECOMBINATION	-	0.0041303
Sum of squares (Variance) (T14)	MAPK_SIGNALING_PATHWAY	+	0.0074096
Sum of squares (Variance) (T14)	CYTOKINE_CYTOKINE_RECEPTOR_INTERACTION	+	0
Sum of squares (Variance) (T14)	CHEMOKINE_SIGNALING_PATHWAY	+	0
Sum of squares (Variance) (T14)	NEUROACTIVE_LIGAND_RECEPTOR_INTERACTION	+	0.013694
Sum of squares (Variance) (T14)	LYSOSOME	+	0.025258
Sum of squares (Variance) (T14)	ENDOCYTOSIS	+	0.021194
Sum of squares (Variance) (T14)	APOPTOSIS	+	0.0038928
Sum of squares (Variance) (T14)	VEGF_SIGNALING_PATHWAY	+	0.023936
Sum of squares (Variance) (T14)	FOCAL_ADHESION	+	5.4718e-05
Sum of squares (Variance) (T14)	ECM_RECEPTOR_INTERACTION	+	0.0039069
Sum of squares (Variance) (T14)	CELL_ADHESION_MOLECULES_CAMS	+	0
Sum of squares (Variance) (T14)	ADHERENS_JUNCTION	+	0.048162
Sum of squares (Variance) (T14)	GAP_JUNCTION	+	0.047997
Sum of squares (Variance) (T14)	COMPLEMENT_AND_COAGULATION_CASCADES	+	0.0001026
Sum of squares (Variance) (T14)	ANTIGEN_PROCESSING_AND_PRESENTATION	+	0
Sum of squares (Variance) (T14)	RENIN_ANGIOTENSIN_SYSTEM	+	0.0055353
Sum of squares (Variance) (T14)	TOLL_LIKE_RECEPTOR_SIGNALING_PATHWAY	+	0.0058596
Sum of squares (Variance) (T14)	NOD_LIKE_RECEPTOR_SIGNALING_PATHWAY	+	0.00013519
Sum of squares (Variance) (T14)	JAK_STAT_SIGNALING_PATHWAY	+	3.5176e-05
Sum of squares (Variance) (T14)	HEMATOPOIETIC_CELL_LINEAGE	+	0
Sum of squares (Variance) (T14)	NATURAL_KILLER_CELL_MEDIATED_CYTOTOXICITY	+	0
Sum of squares (Variance) (T14)	T_CELL_RECEPTOR_SIGNALING_PATHWAY	+	0.0056292
Sum of squares (Variance) (T14)	B_CELL_RECEPTOR_SIGNALING_PATHWAY	+	0.0082023
Sum of squares (Variance) (T14)	FC_EPSILON_RI_SIGNALING_PATHWAY	+	0.048176
Sum of squares (Variance) (T14)	FC_GAMMA_R_MEDIATED_PHAGOCYTOSIS	+	0.0057707
Sum of squares (Variance) (T14)	LEUKOCYTE_TRANSENDOTHELIAL_MIGRATION	+	0.007162
Sum of squares (Variance) (T14)	INTESTINAL_IMMUNE_NETWORK_FOR_IGA_PRODUCTION	+	0
Sum of squares (Variance) (T14)	LONG_TERM_DEPRESSION	+	0.020276
Sum of squares (Variance) (T14)	REGULATION_OF_ACTIN_CYTOSKELETON	+	0.020317
Sum of squares (Variance) (T14)	TYPE_II_DIABETES_MELLITUS	+	0.034749
Sum of squares (Variance) (T14)	TYPE_I_DIABETES_MELLITUS	+	0
Sum of squares (Variance) (T14)	MATURITY_ONSET_DIABETES_OF_THE_YOUNG	+	0.020227
Sum of squares (Variance) (T14)	ALDOSTERONE_REGULATED_SODIUM_REABSORPTION	+	0.00035567
Sum of squares (Variance) (T14)	PRION_DISEASES	+	0.0039024
Sum of squares (Variance) (T14)	LEISHMANIA_INFECTION	+	0.0022463
Sum of squares (Variance) (T14)	PATHWAYS_IN_CANCER	+	0.03004
Sum of squares (Variance) (T14)	COLORECTAL_CANCER	+	0.029006
Sum of squares (Variance) (T14)	BASAL_CELL_CARCINOMA	+	0.04881
Sum of squares (Variance) (T14)	MELANOMA	+	0.049793
Sum of squares (Variance) (T14)	ACUTE_MYELOID_LEUKEMIA	+	0.028911
Sum of squares (Variance) (T14)	ASTHMA	+	0
Sum of squares (Variance) (T14)	AUTOIMMUNE_THYROID_DISEASE	+	0
Sum of squares (Variance) (T14)	ALLOGRAFT_REJECTION	+	0
Sum of squares (Variance) (T14)	GRAFT_VERSUS_HOST_DISEASE	+	0
Sum of squares (Variance) (T14)	HYPERTROPHIC_CARDIOMYOPATHY_HCM	+	0.020205
Sum of squares (Variance) (T14)	ARRHYTHMOGENIC_RIGHT_VENTRICULAR_CARDIOMYOPATHY_ARVC	+	0.0075394
Sum of squares (Variance) (T14)	DILATED_CARDIOMYOPATHY	+	0.041032
Sum of squares (Variance) (T14)	VIRAL_MYOCARDITIS	+	0
Maximum enhancement (K1)	CITRATE_CYCLE_TCA_CYCLE	-	0.013038
Maximum enhancement (K1)	GLYCOSAMINOGLYCAN_DEGRADATION	-	0.010287
Maximum enhancement (K1)	RIBOSOME	+	0
Maximum enhancement (K1)	PROTEASOME	-	0.00019511
Maximum enhancement (K1)	CYTOKINE_CYTOKINE_RECEPTOR_INTERACTION	-	0.00030725
Maximum enhancement (K1)	CHEMOKINE_SIGNALING_PATHWAY	-	0.00017058
Maximum enhancement (K1)	LYSOSOME	-	0.00034496
Maximum enhancement (K1)	VEGF_SIGNALING_PATHWAY	-	0.0042032
Maximum enhancement (K1)	CELL_ADHESION_MOLECULES_CAMS	-	0.0011519
Maximum enhancement (K1)	ANTIGEN_PROCESSING_AND_PRESENTATION	-	0
Maximum enhancement (K1)	TOLL_LIKE_RECEPTOR_SIGNALING_PATHWAY	-	0.00018371
Maximum enhancement (K1)	NOD_LIKE_RECEPTOR_SIGNALING_PATHWAY	-	0.008221
Maximum enhancement (K1)	RIG_I_LIKE_RECEPTOR_SIGNALING_PATHWAY	-	0.022251
Maximum enhancement (K1)	CYTOSOLIC_DNA_SENSING_PATHWAY	-	0.041511
Maximum enhancement (K1)	JAK_STAT_SIGNALING_PATHWAY	-	0.010184
Maximum enhancement (K1)	HEMATOPOIETIC_CELL_LINEAGE	-	0.001869
Maximum enhancement (K1)	NATURAL_KILLER_CELL_MEDIATED_CYTOTOXICITY	-	0
Maximum enhancement (K1)	T_CELL_RECEPTOR_SIGNALING_PATHWAY	-	0.00023587
Maximum enhancement (K1)	B_CELL_RECEPTOR_SIGNALING_PATHWAY	-	0.00019072
Maximum enhancement (K1)	FC_EPSILON_RI_SIGNALING_PATHWAY	-	0.00039171
Maximum enhancement (K1)	FC_GAMMA_R_MEDIATED_PHAGOCYTOSIS	-	0.0025817
Maximum enhancement (K1)	INTESTINAL_IMMUNE_NETWORK_FOR_IGA_PRODUCTION	-	0
Maximum enhancement (K1)	TYPE_I_DIABETES_MELLITUS	-	0
Maximum enhancement (K1)	PRION_DISEASES	-	0.0056745
Maximum enhancement (K1)	PATHOGENIC_ESCHERICHIA_COLI_INFECTION	-	0.0001769
Maximum enhancement (K1)	LEISHMANIA_INFECTION	-	0
Maximum enhancement (K1)	ASTHMA	-	0
Maximum enhancement (K1)	AUTOIMMUNE_THYROID_DISEASE	-	0
Maximum enhancement (K1)	SYSTEMIC_LUPUS_ERYTHEMATOSUS	-	8.4431e-05
Maximum enhancement (K1)	ALLOGRAFT_REJECTION	-	0
Maximum enhancement (K1)	GRAFT_VERSUS_HOST_DISEASE	-	0
Maximum enhancement (K1)	PRIMARY_IMMUNODEFICIENCY	-	0.00015921
Maximum enhancement (K1)	VIRAL_MYOCARDITIS	-	5.3071e-05
Time to peak (K2)	OXIDATIVE_PHOSPHORYLATION	-	0.005629
Time to peak (K2)	RIBOSOME	-	0.013895
Time to peak (K2)	DNA_REPLICATION	-	0.025098
Time to peak (K2)	PEROXISOME	-	0.016206
Time to peak (K2)	TYPE_I_DIABETES_MELLITUS	-	0.0051503
Time to peak (K2)	PARKINSONS_DISEASE	-	0.015539
Time to peak (K2)	AUTOIMMUNE_THYROID_DISEASE	-	0.0029053
Time to peak (K2)	SYSTEMIC_LUPUS_ERYTHEMATOSUS	-	0
Time to peak (K2)	ALLOGRAFT_REJECTION	-	0.0028228
Time to peak (K2)	GRAFT_VERSUS_HOST_DISEASE	-	0.04177
Time to peak (K2)	PRIMARY_IMMUNODEFICIENCY	-	0.002179
Uptake rate (K3)	GLYCOLYSIS_GLUCONEOGENESIS	-	0.0064943
Uptake rate (K3)	FRUCTOSE_AND_MANNOSE_METABOLISM	-	0.018636
Uptake rate (K3)	PYRIMIDINE_METABOLISM	-	0.024018
Uptake rate (K3)	RIBOFLAVIN_METABOLISM	-	0.024652
Uptake rate (K3)	RIBOSOME	+	0.021387
Uptake rate (K3)	RNA_POLYMERASE	-	0.03328
Uptake rate (K3)	SPLICEOSOME	-	0.0069678
Uptake rate (K3)	PROTEASOME	-	0
Uptake rate (K3)	PROTEIN_EXPORT	-	0.024852
Uptake rate (K3)	LYSOSOME	-	0.049217
Uptake rate (K3)	ANTIGEN_PROCESSING_AND_PRESENTATION	-	0
Uptake rate (K3)	CYTOSOLIC_DNA_SENSING_PATHWAY	-	0.034829
Uptake rate (K3)	INTESTINAL_IMMUNE_NETWORK_FOR_IGA_PRODUCTION	-	5.144e-05
Uptake rate (K3)	TYPE_I_DIABETES_MELLITUS	-	0.0071587
Uptake rate (K3)	PRION_DISEASES	-	0.026037
Uptake rate (K3)	PATHOGENIC_ESCHERICHIA_COLI_INFECTION	-	0.027704
Uptake rate (K3)	LEISHMANIA_INFECTION	-	0.0016879
Uptake rate (K3)	ASTHMA	-	0.00015003
Uptake rate (K3)	AUTOIMMUNE_THYROID_DISEASE	-	0.001929
Uptake rate (K3)	ALLOGRAFT_REJECTION	-	0
Uptake rate (K3)	GRAFT_VERSUS_HOST_DISEASE	-	0
Washout rate (K4)	CITRATE_CYCLE_TCA_CYCLE	+	0.028867
Washout rate (K4)	OXIDATIVE_PHOSPHORYLATION	+	0.0062602
Washout rate (K4)	VALINE_LEUCINE_AND_ISOLEUCINE_DEGRADATION	+	0.01969
Washout rate (K4)	N_GLYCAN_BIOSYNTHESIS	+	0.034717
Washout rate (K4)	O_GLYCAN_BIOSYNTHESIS	+	0.048526
Washout rate (K4)	PROPANOATE_METABOLISM	+	0.04563
Washout rate (K4)	DNA_REPLICATION	+	0.042341
Washout rate (K4)	PEROXISOME	+	0.00070135
Washout rate (K4)	ALZHEIMERS_DISEASE	+	0.0057277
Washout rate (K4)	PARKINSONS_DISEASE	+	0.010364
Washout rate (K4)	HUNTINGTONS_DISEASE	+	0.018157
Curve shape index (K5)	GLYCOSPHINGOLIPID_BIOSYNTHESIS_GLOBO_SERIES	+	0.026281
Curve shape index (K5)	RIBOSOME	+	0
Curve shape index (K5)	RNA_POLYMERASE	+	0.02704
Curve shape index (K5)	DNA_REPLICATION	+	0.029277
Curve shape index (K5)	SPLICEOSOME	+	3.2196e-05
Curve shape index (K5)	PROTEASOME	+	0
Curve shape index (K5)	CYTOKINE_CYTOKINE_RECEPTOR_INTERACTION	+	0
Curve shape index (K5)	CHEMOKINE_SIGNALING_PATHWAY	+	0.00023342
Curve shape index (K5)	CELL_ADHESION_MOLECULES_CAMS	+	0.0074929
Curve shape index (K5)	ANTIGEN_PROCESSING_AND_PRESENTATION	+	0
Curve shape index (K5)	TOLL_LIKE_RECEPTOR_SIGNALING_PATHWAY	+	0.017458
Curve shape index (K5)	NOD_LIKE_RECEPTOR_SIGNALING_PATHWAY	+	0.0046424
Curve shape index (K5)	CYTOSOLIC_DNA_SENSING_PATHWAY	+	0.0016814
Curve shape index (K5)	JAK_STAT_SIGNALING_PATHWAY	+	0.02067
Curve shape index (K5)	HEMATOPOIETIC_CELL_LINEAGE	+	0
Curve shape index (K5)	NATURAL_KILLER_CELL_MEDIATED_CYTOTOXICITY	+	4.2928e-05
Curve shape index (K5)	T_CELL_RECEPTOR_SIGNALING_PATHWAY	+	0.00084846
Curve shape index (K5)	B_CELL_RECEPTOR_SIGNALING_PATHWAY	+	0.014011
Curve shape index (K5)	INTESTINAL_IMMUNE_NETWORK_FOR_IGA_PRODUCTION	+	0
Curve shape index (K5)	TYPE_I_DIABETES_MELLITUS	+	0
Curve shape index (K5)	PRION_DISEASES	+	0.024235
Curve shape index (K5)	PATHOGENIC_ESCHERICHIA_COLI_INFECTION	+	0.011876
Curve shape index (K5)	LEISHMANIA_INFECTION	+	3.5123e-05
Curve shape index (K5)	ASTHMA	+	2.9719e-05
Curve shape index (K5)	AUTOIMMUNE_THYROID_DISEASE	+	0
Curve shape index (K5)	SYSTEMIC_LUPUS_ERYTHEMATOSUS	+	0.0044044
Curve shape index (K5)	ALLOGRAFT_REJECTION	+	0
Curve shape index (K5)	GRAFT_VERSUS_HOST_DISEASE	+	0
Curve shape index (K5)	PRIMARY_IMMUNODEFICIENCY	+	2.7597e-05
Curve shape index (K5)	VIRAL_MYOCARDITIS	+	0.0029214
E1 (K6)	GLYCOSAMINOGLYCAN_DEGRADATION	-	0.0089808
E1 (K6)	GLYCOSAMINOGLYCAN_BIOSYNTHESIS_KERATAN_SULFATE	-	0.01657
E1 (K6)	GLYCOSPHINGOLIPID_BIOSYNTHESIS_LACTO_AND_NEOLACTO_SERIES	-	0.042195
E1 (K6)	GLYCOSPHINGOLIPID_BIOSYNTHESIS_GANGLIO_SERIES	-	0.0050077
E1 (K6)	PROTEASOME	-	0
E1 (K6)	CYTOKINE_CYTOKINE_RECEPTOR_INTERACTION	-	0
E1 (K6)	CHEMOKINE_SIGNALING_PATHWAY	-	0
E1 (K6)	NEUROACTIVE_LIGAND_RECEPTOR_INTERACTION	-	0.016792
E1 (K6)	LYSOSOME	-	0
E1 (K6)	VEGF_SIGNALING_PATHWAY	-	0.0028794
E1 (K6)	CELL_ADHESION_MOLECULES_CAMS	-	0
E1 (K6)	ANTIGEN_PROCESSING_AND_PRESENTATION	-	0
E1 (K6)	TOLL_LIKE_RECEPTOR_SIGNALING_PATHWAY	-	7.2864e-05
E1 (K6)	NOD_LIKE_RECEPTOR_SIGNALING_PATHWAY	-	0.0014606
E1 (K6)	RIG_I_LIKE_RECEPTOR_SIGNALING_PATHWAY	-	0.016647
E1 (K6)	CYTOSOLIC_DNA_SENSING_PATHWAY	-	0.0011431
E1 (K6)	JAK_STAT_SIGNALING_PATHWAY	-	0.00087256
E1 (K6)	HEMATOPOIETIC_CELL_LINEAGE	-	0
E1 (K6)	NATURAL_KILLER_CELL_MEDIATED_CYTOTOXICITY	-	0
E1 (K6)	T_CELL_RECEPTOR_SIGNALING_PATHWAY	-	4.3927e-05
E1 (K6)	B_CELL_RECEPTOR_SIGNALING_PATHWAY	-	6.9552e-05
E1 (K6)	FC_EPSILON_RI_SIGNALING_PATHWAY	-	0.0011882
E1 (K6)	FC_GAMMA_R_MEDIATED_PHAGOCYTOSIS	-	0.0025554
E1 (K6)	LEUKOCYTE_TRANSENDOTHELIAL_MIGRATION	-	0.0028012
E1 (K6)	INTESTINAL_IMMUNE_NETWORK_FOR_IGA_PRODUCTION	-	0
E1 (K6)	TYPE_I_DIABETES_MELLITUS	-	0
E1 (K6)	PRION_DISEASES	-	0.0027075
E1 (K6)	PATHOGENIC_ESCHERICHIA_COLI_INFECTION	-	0.0012742
E1 (K6)	LEISHMANIA_INFECTION	-	0
E1 (K6)	ASTHMA	-	0
E1 (K6)	AUTOIMMUNE_THYROID_DISEASE	-	0
E1 (K6)	SYSTEMIC_LUPUS_ERYTHEMATOSUS	-	0
E1 (K6)	ALLOGRAFT_REJECTION	-	0
E1 (K6)	GRAFT_VERSUS_HOST_DISEASE	-	0
E1 (K6)	PRIMARY_IMMUNODEFICIENCY	-	0
E1 (K6)	VIRAL_MYOCARDITIS	-	0
Signal Enhancement Ratio (SER) (K7)	GLYCOSPHINGOLIPID_BIOSYNTHESIS_GLOBO_SERIES	-	0.028189
Signal Enhancement Ratio (SER) (K7)	RIBOSOME	-	0
Signal Enhancement Ratio (SER) (K7)	RNA_POLYMERASE	-	0.023084
Signal Enhancement Ratio (SER) (K7)	DNA_REPLICATION	-	0.029006
Signal Enhancement Ratio (SER) (K7)	SPLICEOSOME	-	0
Signal Enhancement Ratio (SER) (K7)	PROTEASOME	-	0
Signal Enhancement Ratio (SER) (K7)	CYTOKINE_CYTOKINE_RECEPTOR_INTERACTION	-	0
Signal Enhancement Ratio (SER) (K7)	CHEMOKINE_SIGNALING_PATHWAY	-	0.00028935
Signal Enhancement Ratio (SER) (K7)	CELL_ADHESION_MOLECULES_CAMS	-	0.006658
Signal Enhancement Ratio (SER) (K7)	ANTIGEN_PROCESSING_AND_PRESENTATION	-	0
Signal Enhancement Ratio (SER) (K7)	TOLL_LIKE_RECEPTOR_SIGNALING_PATHWAY	-	0.014038
Signal Enhancement Ratio (SER) (K7)	NOD_LIKE_RECEPTOR_SIGNALING_PATHWAY	-	0.0043724
Signal Enhancement Ratio (SER) (K7)	CYTOSOLIC_DNA_SENSING_PATHWAY	-	0.0013646
Signal Enhancement Ratio (SER) (K7)	JAK_STAT_SIGNALING_PATHWAY	-	0.019156
Signal Enhancement Ratio (SER) (K7)	HEMATOPOIETIC_CELL_LINEAGE	-	0
Signal Enhancement Ratio (SER) (K7)	NATURAL_KILLER_CELL_MEDIATED_CYTOTOXICITY	-	7.716e-05
Signal Enhancement Ratio (SER) (K7)	T_CELL_RECEPTOR_SIGNALING_PATHWAY	-	0.00062031
Signal Enhancement Ratio (SER) (K7)	B_CELL_RECEPTOR_SIGNALING_PATHWAY	-	0.01054
Signal Enhancement Ratio (SER) (K7)	INTESTINAL_IMMUNE_NETWORK_FOR_IGA_PRODUCTION	-	0
Signal Enhancement Ratio (SER) (K7)	TYPE_I_DIABETES_MELLITUS	-	0
Signal Enhancement Ratio (SER) (K7)	PRION_DISEASES	-	0.021129
Signal Enhancement Ratio (SER) (K7)	PATHOGENIC_ESCHERICHIA_COLI_INFECTION	-	0.00903
Signal Enhancement Ratio (SER) (K7)	LEISHMANIA_INFECTION	-	0
Signal Enhancement Ratio (SER) (K7)	ASTHMA	-	9.8923e-06
Signal Enhancement Ratio (SER) (K7)	AUTOIMMUNE_THYROID_DISEASE	-	0
Signal Enhancement Ratio (SER) (K7)	SYSTEMIC_LUPUS_ERYTHEMATOSUS	-	0.0030028
Signal Enhancement Ratio (SER) (K7)	ALLOGRAFT_REJECTION	-	0
Signal Enhancement Ratio (SER) (K7)	GRAFT_VERSUS_HOST_DISEASE	-	0
Signal Enhancement Ratio (SER) (K7)	PRIMARY_IMMUNODEFICIENCY	-	9.1857e-06
Signal Enhancement Ratio (SER) (K7)	VIRAL_MYOCARDITIS	-	0.0023013
Volume of most enhancing voxels (K8)	GLYCOSPHINGOLIPID_BIOSYNTHESIS_LACTO_AND_NEOLACTO_SERIES	+	0.0036421
Volume of most enhancing voxels (K8)	ABC_TRANSPORTERS	+	0.042955
Volume of most enhancing voxels (K8)	HOMOLOGOUS_RECOMBINATION	+	0.0037889
Volume of most enhancing voxels (K8)	CYTOKINE_CYTOKINE_RECEPTOR_INTERACTION	+	0.017271
Volume of most enhancing voxels (K8)	CHEMOKINE_SIGNALING_PATHWAY	+	0.0088512
Volume of most enhancing voxels (K8)	CELL_CYCLE	+	0.0017081
Volume of most enhancing voxels (K8)	CELL_ADHESION_MOLECULES_CAMS	+	0.0046705
Volume of most enhancing voxels (K8)	ANTIGEN_PROCESSING_AND_PRESENTATION	+	0.0038174
Volume of most enhancing voxels (K8)	TOLL_LIKE_RECEPTOR_SIGNALING_PATHWAY	+	0.0091285
Volume of most enhancing voxels (K8)	NOD_LIKE_RECEPTOR_SIGNALING_PATHWAY	+	0.010695
Volume of most enhancing voxels (K8)	NATURAL_KILLER_CELL_MEDIATED_CYTOTOXICITY	+	0.0040201
Volume of most enhancing voxels (K8)	T_CELL_RECEPTOR_SIGNALING_PATHWAY	+	0.00077642
Volume of most enhancing voxels (K8)	FC_GAMMA_R_MEDIATED_PHAGOCYTOSIS	+	0.022475
Volume of most enhancing voxels (K8)	LEUKOCYTE_TRANSENDOTHELIAL_MIGRATION	+	0.037206
Volume of most enhancing voxels (K8)	INTESTINAL_IMMUNE_NETWORK_FOR_IGA_PRODUCTION	+	0.0019669
Volume of most enhancing voxels (K8)	TYPE_I_DIABETES_MELLITUS	+	0.041263
Volume of most enhancing voxels (K8)	NON_SMALL_CELL_LUNG_CANCER	+	0.015702
Volume of most enhancing voxels (K8)	AUTOIMMUNE_THYROID_DISEASE	+	0.0022361
Volume of most enhancing voxels (K8)	SYSTEMIC_LUPUS_ERYTHEMATOSUS	+	0.00031057
Volume of most enhancing voxels (K8)	ALLOGRAFT_REJECTION	+	0.00051761
Volume of most enhancing voxels (K8)	GRAFT_VERSUS_HOST_DISEASE	+	0.0014946
Volume of most enhancing voxels (K8)	PRIMARY_IMMUNODEFICIENCY	+	0.00054349
Total Rate Variation (TRV) (K9)	STEROID_BIOSYNTHESIS	-	0.046525
Total Rate Variation (TRV) (K9)	GLYCOSPHINGOLIPID_BIOSYNTHESIS_LACTO_AND_NEOLACTO_SERIES	-	0.012094
Total Rate Variation (TRV) (K9)	PROTEASOME	-	0.049753
Total Rate Variation (TRV) (K9)	PROTEIN_EXPORT	-	0.016629
Total Rate Variation (TRV) (K9)	GRAFT_VERSUS_HOST_DISEASE	-	0.049435
Normalized TRV (NTRV) (K10)	OXIDATIVE_PHOSPHORYLATION	-	0.042077
Normalized TRV (NTRV) (K10)	PYRIMIDINE_METABOLISM	-	0.022669
Normalized TRV (NTRV) (K10)	RNA_POLYMERASE	-	0.00016449
Normalized TRV (NTRV) (K10)	DNA_REPLICATION	-	0.0002996
Normalized TRV (NTRV) (K10)	SPLICEOSOME	-	0
Normalized TRV (NTRV) (K10)	PROTEASOME	-	0
Normalized TRV (NTRV) (K10)	PROTEIN_EXPORT	-	0.021788
Normalized TRV (NTRV) (K10)	CELL_CYCLE	-	0.0073156
Normalized TRV (NTRV) (K10)	ANTIGEN_PROCESSING_AND_PRESENTATION	-	0
Normalized TRV (NTRV) (K10)	TYPE_I_DIABETES_MELLITUS	-	0.0057571
Normalized TRV (NTRV) (K10)	ASTHMA	-	0.023787
Normalized TRV (NTRV) (K10)	AUTOIMMUNE_THYROID_DISEASE	-	0.00092525
Normalized TRV (NTRV) (K10)	ALLOGRAFT_REJECTION	-	0
Normalized TRV (NTRV) (K10)	GRAFT_VERSUS_HOST_DISEASE	-	0
Maximum enhancement-variance (E1)	PYRIMIDINE_METABOLISM	-	0.038969
Maximum enhancement-variance (E1)	O_GLYCAN_BIOSYNTHESIS	+	0.030646
Maximum enhancement-variance (E1)	ABC_TRANSPORTERS	+	0.041806
Maximum enhancement-variance (E1)	RIBOSOME	+	0.04325
Maximum enhancement-variance (E1)	RNA_POLYMERASE	-	0.0050449
Maximum enhancement-variance (E1)	HOMOLOGOUS_RECOMBINATION	-	0.038656
Maximum enhancement-variance (E1)	CYTOKINE_CYTOKINE_RECEPTOR_INTERACTION	+	0.012784
Maximum enhancement-variance (E1)	FOCAL_ADHESION	+	0.027505
Maximum enhancement-variance (E1)	CELL_ADHESION_MOLECULES_CAMS	+	0.011886
Maximum enhancement-variance (E1)	COMPLEMENT_AND_COAGULATION_CASCADES	+	0.0099841
Maximum enhancement-variance (E1)	JAK_STAT_SIGNALING_PATHWAY	+	0.014263
Maximum enhancement-variance (E1)	HEMATOPOIETIC_CELL_LINEAGE	+	0.017749
Maximum enhancement-variance (E1)	CIRCADIAN_RHYTHM_MAMMAL	+	0.013074
Maximum enhancement-variance (E1)	ALDOSTERONE_REGULATED_SODIUM_REABSORPTION	+	0.011093
Maximum enhancement-variance (E1)	SYSTEMIC_LUPUS_ERYTHEMATOSUS	-	0.033859
Enhancement-Variance Time to Peak (E2)	GLYCOLYSIS_GLUCONEOGENESIS	-	0.00048796
Enhancement-Variance Time to Peak (E2)	PENTOSE_PHOSPHATE_PATHWAY	-	0.00049166
Enhancement-Variance Time to Peak (E2)	GALACTOSE_METABOLISM	-	0.0017353
Enhancement-Variance Time to Peak (E2)	STEROID_BIOSYNTHESIS	-	0.0021909
Enhancement-Variance Time to Peak (E2)	OXIDATIVE_PHOSPHORYLATION	-	0.00053479
Enhancement-Variance Time to Peak (E2)	ARGININE_AND_PROLINE_METABOLISM	-	0.03045
Enhancement-Variance Time to Peak (E2)	AMINO_SUGAR_AND_NUCLEOTIDE_SUGAR_METABOLISM	-	0.0038582
Enhancement-Variance Time to Peak (E2)	GLYCOSAMINOGLYCAN_DEGRADATION	-	0.0066762
Enhancement-Variance Time to Peak (E2)	GLYCOSAMINOGLYCAN_BIOSYNTHESIS_CHONDROITIN_SULFATE	-	0.0058864
Enhancement-Variance Time to Peak (E2)	GLYCOSAMINOGLYCAN_BIOSYNTHESIS_KERATAN_SULFATE	-	0.0037189
Enhancement-Variance Time to Peak (E2)	GLYCOSPHINGOLIPID_BIOSYNTHESIS_GLOBO_SERIES	-	0.027281
Enhancement-Variance Time to Peak (E2)	BIOSYNTHESIS_OF_UNSATURATED_FATTY_ACIDS	-	0.02844
Enhancement-Variance Time to Peak (E2)	RIBOSOME	+	0
Enhancement-Variance Time to Peak (E2)	PROTEASOME	-	0.0005255
Enhancement-Variance Time to Peak (E2)	LYSOSOME	-	0
Enhancement-Variance Time to Peak (E2)	ECM_RECEPTOR_INTERACTION	-	0.028154
Enhancement-Variance Time to Peak (E2)	CELL_ADHESION_MOLECULES_CAMS	-	0.0065644
Enhancement-Variance Time to Peak (E2)	ANTIGEN_PROCESSING_AND_PRESENTATION	-	0
Enhancement-Variance Time to Peak (E2)	NATURAL_KILLER_CELL_MEDIATED_CYTOTOXICITY	-	0.033623
Enhancement-Variance Time to Peak (E2)	FC_GAMMA_R_MEDIATED_PHAGOCYTOSIS	-	0.015198
Enhancement-Variance Time to Peak (E2)	LEUKOCYTE_TRANSENDOTHELIAL_MIGRATION	-	0.026849
Enhancement-Variance Time to Peak (E2)	INTESTINAL_IMMUNE_NETWORK_FOR_IGA_PRODUCTION	-	0.041703
Enhancement-Variance Time to Peak (E2)	TASTE_TRANSDUCTION	+	0.0041907
Enhancement-Variance Time to Peak (E2)	REGULATION_OF_ACTIN_CYTOSKELETON	-	0.0049966
Enhancement-Variance Time to Peak (E2)	TYPE_I_DIABETES_MELLITUS	-	0.00046578
Enhancement-Variance Time to Peak (E2)	ALZHEIMERS_DISEASE	-	0.028263
Enhancement-Variance Time to Peak (E2)	PARKINSONS_DISEASE	-	0.0025169
Enhancement-Variance Time to Peak (E2)	HUNTINGTONS_DISEASE	-	0.026511
Enhancement-Variance Time to Peak (E2)	VIBRIO_CHOLERAE_INFECTION	-	0
Enhancement-Variance Time to Peak (E2)	PATHOGENIC_ESCHERICHIA_COLI_INFECTION	-	0.00052224
Enhancement-Variance Time to Peak (E2)	LEISHMANIA_INFECTION	-	0.0014387
Enhancement-Variance Time to Peak (E2)	ASTHMA	-	0.0014847
Enhancement-Variance Time to Peak (E2)	AUTOIMMUNE_THYROID_DISEASE	-	0
Enhancement-Variance Time to Peak (E2)	SYSTEMIC_LUPUS_ERYTHEMATOSUS	-	0
Enhancement-Variance Time to Peak (E2)	ALLOGRAFT_REJECTION	-	0.00012938
Enhancement-Variance Time to Peak (E2)	GRAFT_VERSUS_HOST_DISEASE	-	0.00051236
Enhancement-Variance Time to Peak (E2)	VIRAL_MYOCARDITIS	-	0.0010536
Enhancement-variance Increasing Rate (E3)	STEROID_BIOSYNTHESIS	+	0.0080629
Enhancement-variance Increasing Rate (E3)	STEROID_HORMONE_BIOSYNTHESIS	+	0.020589
Enhancement-variance Increasing Rate (E3)	ARACHIDONIC_ACID_METABOLISM	+	0.018053
Enhancement-variance Increasing Rate (E3)	RNA_POLYMERASE	-	0.026194
Enhancement-variance Increasing Rate (E3)	CYTOKINE_CYTOKINE_RECEPTOR_INTERACTION	+	0.0083098
Enhancement-variance Increasing Rate (E3)	FOCAL_ADHESION	+	0.021556
Enhancement-variance Increasing Rate (E3)	ECM_RECEPTOR_INTERACTION	+	0.040232
Enhancement-variance Increasing Rate (E3)	CELL_ADHESION_MOLECULES_CAMS	+	0.010564
Enhancement-variance Increasing Rate (E3)	COMPLEMENT_AND_COAGULATION_CASCADES	+	0.0066917
Enhancement-variance Increasing Rate (E3)	JAK_STAT_SIGNALING_PATHWAY	+	0.039208
Enhancement-variance Increasing Rate (E3)	HEMATOPOIETIC_CELL_LINEAGE	+	0.0058826
Enhancement-variance Increasing Rate (E3)	CIRCADIAN_RHYTHM_MAMMAL	+	0.0091874
Enhancement-variance Increasing Rate (E3)	ALDOSTERONE_REGULATED_SODIUM_REABSORPTION	+	0.036431
Enhancement-variance Increasing Rate (E3)	ARRHYTHMOGENIC_RIGHT_VENTRICULAR_CARDIOMYOPATHY_ARVC	+	0.040175
Enhancement-variance Decreasing Rate (E4)	GALACTOSE_METABOLISM	+	0.020415
Enhancement-variance Decreasing Rate (E4)	TRYPTOPHAN_METABOLISM	+	0.024074
Enhancement-variance Decreasing Rate (E4)	AMINO_SUGAR_AND_NUCLEOTIDE_SUGAR_METABOLISM	+	0.0039007
Enhancement-variance Decreasing Rate (E4)	GLYCOSAMINOGLYCAN_DEGRADATION	+	0.0031532
Enhancement-variance Decreasing Rate (E4)	GLYCOSAMINOGLYCAN_BIOSYNTHESIS_CHONDROITIN_SULFATE	+	0.0034352
Enhancement-variance Decreasing Rate (E4)	GLYCOSAMINOGLYCAN_BIOSYNTHESIS_KERATAN_SULFATE	+	0.0018084
Enhancement-variance Decreasing Rate (E4)	GLYCOSPHINGOLIPID_BIOSYNTHESIS_LACTO_AND_NEOLACTO_SERIES	+	0.033616
Enhancement-variance Decreasing Rate (E4)	GLYCOSPHINGOLIPID_BIOSYNTHESIS_GANGLIO_SERIES	+	0.049905
Enhancement-variance Decreasing Rate (E4)	RIBOSOME	-	0
Enhancement-variance Decreasing Rate (E4)	PROTEASOME	+	0.030538
Enhancement-variance Decreasing Rate (E4)	CALCIUM_SIGNALING_PATHWAY	+	0.02195
Enhancement-variance Decreasing Rate (E4)	CYTOKINE_CYTOKINE_RECEPTOR_INTERACTION	+	0
Enhancement-variance Decreasing Rate (E4)	CHEMOKINE_SIGNALING_PATHWAY	+	0
Enhancement-variance Decreasing Rate (E4)	NEUROACTIVE_LIGAND_RECEPTOR_INTERACTION	+	0.023922
Enhancement-variance Decreasing Rate (E4)	LYSOSOME	+	0.00022255
Enhancement-variance Decreasing Rate (E4)	APOPTOSIS	+	0.036723
Enhancement-variance Decreasing Rate (E4)	DORSO_VENTRAL_AXIS_FORMATION	+	0.03052
Enhancement-variance Decreasing Rate (E4)	TGF_BETA_SIGNALING_PATHWAY	+	0.0080997
Enhancement-variance Decreasing Rate (E4)	VEGF_SIGNALING_PATHWAY	+	0.045761
Enhancement-variance Decreasing Rate (E4)	FOCAL_ADHESION	+	0.00038901
Enhancement-variance Decreasing Rate (E4)	ECM_RECEPTOR_INTERACTION	+	7.893e-05
Enhancement-variance Decreasing Rate (E4)	CELL_ADHESION_MOLECULES_CAMS	+	0
Enhancement-variance Decreasing Rate (E4)	ADHERENS_JUNCTION	+	0.021316
Enhancement-variance Decreasing Rate (E4)	GAP_JUNCTION	+	0.0016102
Enhancement-variance Decreasing Rate (E4)	COMPLEMENT_AND_COAGULATION_CASCADES	+	0.0036446
Enhancement-variance Decreasing Rate (E4)	ANTIGEN_PROCESSING_AND_PRESENTATION	+	0
Enhancement-variance Decreasing Rate (E4)	RENIN_ANGIOTENSIN_SYSTEM	+	0.03441
Enhancement-variance Decreasing Rate (E4)	TOLL_LIKE_RECEPTOR_SIGNALING_PATHWAY	+	0.0011104
Enhancement-variance Decreasing Rate (E4)	JAK_STAT_SIGNALING_PATHWAY	+	0.022465
Enhancement-variance Decreasing Rate (E4)	HEMATOPOIETIC_CELL_LINEAGE	+	0
Enhancement-variance Decreasing Rate (E4)	NATURAL_KILLER_CELL_MEDIATED_CYTOTOXICITY	+	0
Enhancement-variance Decreasing Rate (E4)	T_CELL_RECEPTOR_SIGNALING_PATHWAY	+	0.023911
Enhancement-variance Decreasing Rate (E4)	B_CELL_RECEPTOR_SIGNALING_PATHWAY	+	0.0050433
Enhancement-variance Decreasing Rate (E4)	FC_GAMMA_R_MEDIATED_PHAGOCYTOSIS	+	0.00079735
Enhancement-variance Decreasing Rate (E4)	LEUKOCYTE_TRANSENDOTHELIAL_MIGRATION	+	0.0010609
Enhancement-variance Decreasing Rate (E4)	INTESTINAL_IMMUNE_NETWORK_FOR_IGA_PRODUCTION	+	0
Enhancement-variance Decreasing Rate (E4)	REGULATION_OF_ACTIN_CYTOSKELETON	+	0.00017908
Enhancement-variance Decreasing Rate (E4)	MELANOGENESIS	+	0.042042
Enhancement-variance Decreasing Rate (E4)	TYPE_I_DIABETES_MELLITUS	+	0
Enhancement-variance Decreasing Rate (E4)	VIBRIO_CHOLERAE_INFECTION	+	0.0027375
Enhancement-variance Decreasing Rate (E4)	PATHOGENIC_ESCHERICHIA_COLI_INFECTION	+	0.00023491
Enhancement-variance Decreasing Rate (E4)	LEISHMANIA_INFECTION	+	0
Enhancement-variance Decreasing Rate (E4)	PATHWAYS_IN_CANCER	+	0.0055118
Enhancement-variance Decreasing Rate (E4)	BLADDER_CANCER	+	0.0034616
Enhancement-variance Decreasing Rate (E4)	ASTHMA	+	0
Enhancement-variance Decreasing Rate (E4)	AUTOIMMUNE_THYROID_DISEASE	+	0
Enhancement-variance Decreasing Rate (E4)	SYSTEMIC_LUPUS_ERYTHEMATOSUS	+	0.00015856
Enhancement-variance Decreasing Rate (E4)	ALLOGRAFT_REJECTION	+	0
Enhancement-variance Decreasing Rate (E4)	GRAFT_VERSUS_HOST_DISEASE	+	0
Enhancement-variance Decreasing Rate (E4)	PRIMARY_IMMUNODEFICIENCY	+	0.0012967
Enhancement-variance Decreasing Rate (E4)	HYPERTROPHIC_CARDIOMYOPATHY_HCM	+	0.030389
Enhancement-variance Decreasing Rate (E4)	ARRHYTHMOGENIC_RIGHT_VENTRICULAR_CARDIOMYOPATHY_ARVC	+	0.023537
Enhancement-variance Decreasing Rate (E4)	DILATED_CARDIOMYOPATHY	+	0.0072003
Enhancement-variance Decreasing Rate (E4)	VIRAL_MYOCARDITIS	+	0

## Sheet: All Pathways by Category
Pathway	Category	Number o f signfiicant radiomic associations
RIBOSOME	Translation	22
RNA_POLYMERASE	Transcription	6
SPLICEOSOME	Transcription	8
ECM_RECEPTOR_INTERACTION	Signaling Molecules and Interactions	4
NEUROACTIVE_LIGAND_RECEPTOR_INTERACTION	Signaling Molecules and Interactions	7
CELL_ADHESION_MOLECULES_CAMS	Signaling Molecules and Interactions	23
CYTOKINE_CYTOKINE_RECEPTOR_INTERACTION	Signaling Molecules and Interactions	30
CALCIUM_SIGNALING_PATHWAY	Signal Transduction	1
NOTCH_SIGNALING_PATHWAY	Signal Transduction	1
TGF_BETA_SIGNALING_PATHWAY	Signal Transduction	1
MAPK_SIGNALING_PATHWAY	Signal Transduction	3
VEGF_SIGNALING_PATHWAY	Signal Transduction	12
JAK_STAT_SIGNALING_PATHWAY	Signal Transduction	22
TASTE_TRANSDUCTION	Sensory	6
MISMATCH_REPAIR	Replication and Repair	3
NON_HOMOLOGOUS_END_JOINING	Replication and Repair	3
BASE_EXCISION_REPAIR	Replication and Repair	4
HOMOLOGOUS_RECOMBINATION	Replication and Repair	7
DNA_REPLICATION	Replication and Repair	10
ARGININE_AND_PROLINE_METABOLISM	Protein Metabolism	1
LYSINE_DEGRADATION	Protein Metabolism	1
TRYPTOPHAN_METABOLISM	Protein Metabolism	1
NICOTINATE_AND_NICOTINAMIDE_METABOLISM	Other Metabolism	1
ONE_CARBON_POOL_BY_FOLATE	Other Metabolism	1
RIBOFLAVIN_METABOLISM	Other Metabolism	1
PYRIMIDINE_METABOLISM	Nucleotide Metabolism	3
AMYOTROPHIC_LATERAL_SCLEROSIS_ALS	Neurodegenerative Diseases	1
ALZHEIMERS_DISEASE	Neurodegenerative Diseases	2
HUNTINGTONS_DISEASE	Neurodegenerative Diseases	2
PARKINSONS_DISEASE	Neurodegenerative Diseases	4
PRION_DISEASES	Neurodegenerative Diseases	11
LONG_TERM_DEPRESSION	Nervous System	1
PORPHYRIN_AND_CHLOROPHYLL_METABOLISM	Metabolism of Cofactors and Vitamins	2
ABC_TRANSPORTERS	Membrane Transport	2
ARACHIDONIC_ACID_METABOLISM	Lipid Metabolism	1
BIOSYNTHESIS_OF_UNSATURATED_FATTY_ACIDS	Lipid Metabolism	7
STEROID_HORMONE_BIOSYNTHESIS	Lipid Metabolism	11
TERPENOID_BACKBONE_BIOSYNTHESIS	Lipid Metabolism	11
STEROID_BIOSYNTHESIS	Lipid Metabolism	18
LEISHMANIA_INFECTION	Infectious Diseases: Parasitic	30
VIBRIO_CHOLERAE_INFECTION	Infectious Diseases: Bacterial	2
PATHOGENIC_ESCHERICHIA_COLI_INFECTION	Infectious Diseases: Bacterial	11
SYSTEMIC_LUPUS_ERYTHEMATOSUS	Immune Diseases	14
PRIMARY_IMMUNODEFICIENCY	Immune Diseases	19
ASTHMA	Immune Diseases	31
ALLOGRAFT_REJECTION	Immune Diseases	33
AUTOIMMUNE_THYROID_DISEASE	Immune Diseases	33
GRAFT_VERSUS_HOST_DISEASE	Immune Diseases	34
LEUKOCYTE_TRANSENDOTHELIAL_MIGRATION	Immune System	7
COMPLEMENT_AND_COAGULATION_CASCADES	Immune System	9
CYTOSOLIC_DNA_SENSING_PATHWAY	Immune System	9
FC_GAMMA_R_MEDIATED_PHAGOCYTOSIS	Immune System	9
RIG_I_LIKE_RECEPTOR_SIGNALING_PATHWAY	Immune System	9
FC_EPSILON_RI_SIGNALING_PATHWAY	Immune System	13
NOD_LIKE_RECEPTOR_SIGNALING_PATHWAY	Immune System	20
T_CELL_RECEPTOR_SIGNALING_PATHWAY	Immune System	21
B_CELL_RECEPTOR_SIGNALING_PATHWAY	Immune System	23
ANTIGEN_PROCESSING_AND_PRESENTATION	Immune System	25
CHEMOKINE_SIGNALING_PATHWAY	Immune System	26
HEMATOPOIETIC_CELL_LINEAGE	Immune System	27
TOLL_LIKE_RECEPTOR_SIGNALING_PATHWAY	Immune System	27
NATURAL_KILLER_CELL_MEDIATED_CYTOTOXICITY	Immune System	28
INTESTINAL_IMMUNE_NETWORK_FOR_IGA_PRODUCTION	Immune System	30
GLYCOSAMINOGLYCAN_BIOSYNTHESIS_CHONDROITIN_SULFATE	Glycan Metabolism	3
GLYCOSAMINOGLYCAN_BIOSYNTHESIS_KERATAN_SULFATE	Glycan Metabolism	3
O_GLYCAN_BIOSYNTHESIS	Glycan Metabolism	3
GLYCOSPHINGOLIPID_BIOSYNTHESIS_GLOBO_SERIES	Glycan Metabolism	4
SPHINGOLIPID_METABOLISM	Glycan Metabolism	4
GLYCOSPHINGOLIPID_BIOSYNTHESIS_LACTO_AND_NEOLACTO_SERIES	Glycan Metabolism	7
N_GLYCAN_BIOSYNTHESIS	Glycan Metabolism	7
OTHER_GLYCAN_DEGRADATION	Glycan Metabolism	7
GLYCOSPHINGOLIPID_BIOSYNTHESIS_GANGLIO_SERIES	Glycan Metabolism	8
GLYCOSAMINOGLYCAN_DEGRADATION	Glycan Metabolism	10
GLYCOSYLPHOSPHATIDYLINOSITOL_GPI_ANCHOR_BIOSYNTHESIS	Glycan Metabolism	12
RNA_DEGRADATION	Folding, Sorting, and Degradation	1
SNARE_INTERACTIONS_IN_VESICULAR_TRANSPORT	Folding, Sorting, and Degradation	2
PROTEIN_EXPORT	Folding, Sorting, and Degradation	4
PROTEASOME	Folding, Sorting, and Degradation	9
ALDOSTERONE_REGULATED_SODIUM_REABSORPTION	Excretory System	4
CIRCADIAN_RHYTHM_MAMMAL	Environmental Adaptation	3
OXIDATIVE_PHOSPHORYLATION	Energy Metabolism	5
MELANOGENESIS	Endocrine System	1
PPAR_SIGNALING_PATHWAY	Endocrine System	2
RENIN_ANGIOTENSIN_SYSTEM	Endocrine System	2
MATURITY_ONSET_DIABETES_OF_THE_YOUNG	Endocrine and Metabolic Diseases	1
TYPE_II_DIABETES_MELLITUS	Endocrine and Metabolic Diseases	1
TYPE_I_DIABETES_MELLITUS	Endocrine and Metabolic Diseases	32
DORSO_VENTRAL_AXIS_FORMATION	Development	1
ADHERENS_JUNCTION	Cellular Community	2
GAP_JUNCTION	Cellular Community	2
FOCAL_ADHESION	Cellular Community	4
REGULATION_OF_ACTIN_CYTOSKELETON	Cell Motility	4
OOCYTE_MEIOSIS	Cell Growth and Death	3
CELL_CYCLE	Cell Growth and Death	7
APOPTOSIS	Cell Growth and Death	11
ENDOCYTOSIS	Catabolism	1
LYSOSOME	Catabolism	13
PEROXISOME	Catabolism	17
DILATED_CARDIOMYOPATHY	Cardiovascular Diseases	2
HYPERTROPHIC_CARDIOMYOPATHY_HCM	Cardiovascular Diseases	2
ARRHYTHMOGENIC_RIGHT_VENTRICULAR_CARDIOMYOPATHY_ARVC	Cardiovascular Diseases	3
VIRAL_MYOCARDITIS	Cardiovascular Diseases	23
FRUCTOSE_AND_MANNOSE_METABOLISM	Carbohydrate Metabolism	1
PENTOSE_PHOSPHATE_PATHWAY	Carbohydrate Metabolism	1
PROPANOATE_METABOLISM	Carbohydrate Metabolism	1
PYRUVATE_METABOLISM	Carbohydrate Metabolism	1
GALACTOSE_METABOLISM	Carbohydrate Metabolism	2
GLYCOLYSIS_GLUCONEOGENESIS	Carbohydrate Metabolism	2
PENTOSE_AND_GLUCURONATE_INTERCONVERSIONS	Carbohydrate Metabolism	2
VALINE_LEUCINE_AND_ISOLEUCINE_DEGRADATION	Carbohydrate Metabolism	3
CITRATE_CYCLE_TCA_CYCLE	Carbohydrate Metabolism	4
AMINO_SUGAR_AND_NUCLEOTIDE_SUGAR_METABOLISM	Carbohydrate Metabolism	5
ACUTE_MYELOID_LEUKEMIA	Cancers: Specifc Types	1
BLADDER_CANCER	Cancers: Specifc Types	1
COLORECTAL_CANCER	Cancers: Specifc Types	1
MELANOMA	Cancers: Specifc Types	1
NON_SMALL_CELL_LUNG_CANCER	Cancers: Specifc Types	1
BASAL_CELL_CARCINOMA	Cancers: Specifc Types	2
PATHWAYS_IN_CANCER	Cancers: Overview	2
